# Supplementary material for: Desde los años inciertos: dietario de recuerdos
Source: MDPI journal article supplement (doi:10.3390/pathogens12091076), 1991-01-01
Supplement: s1 [file s1]

## Supplementary materials

### Supplementary S1. Tables

**Table S1.** Characteristic of studies reported the outcome of Trypanosomiasis infections in animal in Cameroon

|                         | Cattle          | Pigs           | Small ruminants | Total |
|-------------------------|-----------------|----------------|-----------------|-------|
| Number of studies       | 17 <sup>a</sup> | 7 <sup>b</sup> | 5 <sup>c</sup>  | 24    |
| Regions                 |                 |                |                 |       |
| Adamawa                 | 9               | 1              | 1               | 11    |
| North                   | 7               | /              | /               | 7     |
| Far North               | 1               | /              | /               | 1     |
| East                    | 1               | /              | /               | 1     |
| North West              | 1               | /              | /               | 1     |
| South West              | /               | 6              | 4               | 6     |
| Species identified      |                 |                |                 |       |
| T. congolense           | 17              | 3              | 4               | 24    |
| T. vivax                | 17              | 2              | 2               | 21    |
| T. brucei               | 16              | 4              | 2               | 22    |
| T. theileri             | 2               | /              | /               | 2     |
| T. grayi                | 2               | /              | /               | 2     |
| T. simaie               | /               | 1              | 1               | 1     |
| Samples used            |                 |                |                 |       |
| Blood                   | 17              | 7              | 5               | 24    |
| Mid-gut                 | /               | /              | /               | 2     |
| Diagnostic tests        |                 |                |                 |       |
| PCR                     | 2               | 4              | 3               | 6     |
| Microscopy              | 14              | 1              | 1               | 15    |
| ELISA                   | 1               | /              | /               | 1     |
| parasite culture        | /               | 1              | /               | 1     |
| Card Agglutination test | /               | 1              | 1               | 1     |
| Risk factors            |                 |                |                 |       |
| Body condition score    | 1               | /              | /               | 1     |
| Breed                   | 1               | /              | /               | 1     |
| production systems      | 1               | /              | /               | 1     |
| prophylactic measures   | 1               | /              | /               | 1     |
| Age                     | 1               | /              | 1               | 2     |
| Sex                     | 2               | /              | 1               | 3     |
| Season                  | 1               | /              | 1               | 2     |

Legend: <sup>a</sup>: (Awa and Ndamkou, 2006; Mamoudou et al., 2006a; Mamoudou et al., 2006b; Achukwi and Musongong, 2009; Mamoudou et al., 2009; Tanenbe et al., 2010; Mpouam et al., 2011; Mamoudou et al., 2015a; Mamoudou et al., 2015b; Mamoudou et al., 2016a; Mamoudou et al., 2016c; Ikoum, 2017; Mohamadou, 2017; Ngomtcho et al., 2017; Soussai, 2017; Pagueu et al., 2019); <sup>b</sup>: (Nkinin et al., 2002; Simo et al., 2006; Nimpaye et al., 2011; Simo et al., 2012; Simo et al., 2013; Deya-yang, 2016; Fogue et al., 2017) ; <sup>c</sup>: (Nimpaye et al., 2011; Simo et al., 2012; Simo et al., 2013; Diezoumbe, 2017; Fogue et al., 2017).

**Table S2.** Pooled regional prevalences of trypanosomiasis in cattle

| Region  | Number of study reports included in meta-analysis | Pooled prevalence (95%CI) | P-value |
|---------|---------------------------------------------------|---------------------------|---------|
| Adamawa | 9                                                 | 26.1 (18.6-35.3)          | 0.41    |
| North   | 6                                                 | 16.8 (7.5-33.6)           |         |

**Table S3.** Characteristics and distribution of studies reporting other hemoparasitic infections in animals in Cameroon

| Characteristics                   | Cattle         | Small ruminants | Pigs           | Chicken        | Total |
|-----------------------------------|----------------|-----------------|----------------|----------------|-------|
| Number of studies                 | 4 <sup>a</sup> | 3 <sup>b</sup>  | 1 <sup>c</sup> | 1 <sup>d</sup> | 9     |
| Region                            |                |                 |                |                |       |
| Adamawa                           | 3              | 1               | 1              | /              | 5     |
| East                              | /              | /               | /              | 1              | 1     |
| Far North                         | 1              | /               | /              | /              | 1     |
| South                             | /              | 1               | /              | /              | 1     |
| North                             | 1              | 1               | /              | /              | 2     |
| North West                        | 1              | /               | /              | /              | 1     |
| Species identified                |                |                 |                |                |       |
| <i>Babesia</i> <i>Bovis</i>       | 3              | 2               | 1              | /              | 6     |
| <i>Babesia</i> <i>Bigemina</i>    | 3              | 2               | 1              | /              | 6     |
| <i>Theileria</i>                  | 1              | 3               | /              | /              | 4     |
| <i>Anaplasma</i> <i>Centrale</i>  | 3              | 2               | 1              | /              | 7     |
| <i>Anaplasma</i> <i>Marginale</i> | 3              | 2               | 1              | /              | 7     |
| <i>Anaplasma</i> <i>Ovis</i>      | /              | 1               | /              | /              | 1     |
| <i>Borrelia</i> spp               | 1              | /               | /              | /              | 1     |
| <i>Rickettsia</i> spp             | 1              | /               | /              | /              | 1     |
| <i>Ehrlichia</i> spp              | 1              | /               | /              | /              | 1     |
| <i>Leucocytozoon schoutedeni</i>  | /              | /               | /              | 1              | 1     |
| Risk factors                      |                |                 |                |                |       |
| Age                               | /              | 1               | /              | /              | 1     |
| Sex                               | /              | 2               | /              | /              | 2     |
| Season                            | /              | 1               | /              | /              | 1     |
| Samples                           | Blood          |                 |                |                |       |
| Diagnostic techniques BCT         | 1              | /               | 1              | /              | 2     |
| Blood smear                       | 1              | 1               | /              | /              | 1     |
| GIEMSA staining                   | 2              | 2               | /              | /              | 3     |
| PCR                               |                | /               | /              | 1              | 3     |

Legend : <sup>a</sup>: (Esemu et al., 2014; Mamoudou et al., 2017; Soussai, 2017; Abanda et al., 2019) ; <sup>b</sup>: (An'anguil, 2017; Diezoumbe, 2017; Dongmo, 2017a) ; <sup>c</sup>: (Deya-yang, 2016) ; <sup>d</sup>: (Sehgal et al., 2006).

**Table S4.** Pooled prevalence of tick-borne parasites in ruminants in Cameroon

| Disease agent        | Species         | Number of studies | Pooled prevalence (95% CI) | P     | I <sup>2</sup> |
|----------------------|-----------------|-------------------|----------------------------|-------|----------------|
| <i>Babesia</i> spp   | Small ruminants | 2                 | 3.5 (2.2-5.6)              | 0.167 | 47.519         |
|                      | Cattle          | 2                 | 21.6 (4.9-59.7)            | 0.000 | 98.956         |
| <i>Theileria</i> spp | Small ruminants | 3                 | 4.9 (1.9-11.8)             | 0.000 | 96.164         |

|                      |                 |   |                 |       |        |
|----------------------|-----------------|---|-----------------|-------|--------|
| <i>Anaplasma spp</i> | small ruminants | 3 | 10.9 (3.8-27.8) | 0.000 | 97.792 |
|                      | Cattle          | 2 | 35.1 (4.7-85.5) | 0.000 | 99.546 |

**Table S5.** Characteristics and distribution of studies reporting gastrointestinal parasites in animals in Cameroon

| Characteristics*                  | Cattle    | Sheep | Goats | Pigs | Chicken | Total |
|-----------------------------------|-----------|-------|-------|------|---------|-------|
| Number of studies                 | 10        | 3     | 5     | 5    | 3       | 22    |
| Region                            |           |       |       |      |         |       |
| Adamawa                           | 4         | 1     | 1     | 1    | 1       | 7     |
| Centre                            | /         | /     | /     | 1    | /       | 1     |
| Far North                         | /         | /     | /     | 1    | /       | 1     |
| Littoral                          | /         | /     | 1     | /    | /       | 1     |
| North                             | 2         | /     | /     | /    | /       | 2     |
| North West                        | 2         | 1     | 1     | /    | /       | 2     |
| South west                        | 1         | /     | /     | /    | 1       | 6     |
| West                              | 1         | 1     | 2     | 2    | 1       | 5     |
| Samples                           | Faeces    |       |       |      |         |       |
| Diagnostic techniques             | Coprology |       |       |      |         |       |
| Risk factors                      |           |       |       |      |         |       |
| Season                            | 1         | /     | /     | /    | /       | 1     |
| Age                               | 1         | 1     | 2     | 2    | /       | 5     |
| Farm hygiene                      | /         | /     | /     | 2    | /       | 2     |
| Species                           | /         | 1     | 1     | /    | /       | 1     |
| Sex                               | 1         | 1     | 2     | /    | /       | 3     |
| Locality                          | 1         | /     | /     | /    | 1       | 2     |
| Feeding                           | /         | /     | /     | 1    | 1       | 2     |
| Prophylaxis                       | 1         | /     | /     | /    | 1       | 2     |
| Farmer's knowledge of the disease | /         | /     | /     | /    | 1       | 1     |

Legend: \*: results do not include studies that reported fascioliasis or cysticercosis only.

**Table S6.** Characteristics and distribution of studies reporting fascioliasis in Cameroon

| Characteristics        | Cattle          | Sheep          | Goats          | Pigs           | Total |
|------------------------|-----------------|----------------|----------------|----------------|-------|
| Number of studies      | 15 <sup>a</sup> | 2 <sup>b</sup> | 1 <sup>c</sup> | 1 <sup>d</sup> | 19    |
| Regions                |                 |                |                |                |       |
| North west             | 3               | /              | /              | /              | 3     |
| Adamawa                | 8               | 1              | 1              | 1              | 10    |
| Centre                 | 1               | 1              | /              | /              | 1     |
| South West             | 1               | /              | /              | /              | 1     |
| Littoral               | 1               | /              | /              | /              | 1     |
| West                   | 3               | /              | /              | /              | 3     |
| Samples                |                 |                |                |                |       |
| Blood                  | 1               | /              | /              | /              | 1     |
| Faeces                 | 8               | 1              | 1              | 1              | 10    |
| Live animal or carcass | 8               | 1              | /              | /              | 9     |
| Diagnostic techniques  |                 |                |                |                |       |
| ELISA                  | 1               | /              | /              | 1              | 1     |
| Coprology              | 9               | 1              | 1              | /              | 11    |
| AM/PM                  | 7               | 1              | /              | /              | 8     |

|                           |    |   |   |   |    |
|---------------------------|----|---|---|---|----|
| Fasciola species          |    |   |   |   |    |
| <i>Fasciola hepatica</i>  | 2  | / | / | / | 2  |
| <i>Fasciola gigantica</i> | 13 | 2 | 1 | 1 | 17 |

Legend: <sup>a</sup>: (Tebug, 2009; Abakar, 2014; Fotso, 2014; Nzale, 2014; Dicko, 2015; Manchang et al., 2016; Salhine, 2016; Tchounkeu, 2017; Ekoual, 2018; Kelly et al., 2018; Kouam et al., 2018a; Mbotake, 2019; Takang et al., 2019; Yemelong, 2019; Chahdini et al., 2020); <sup>b</sup>: (Anoumbo, 2017; Takang et al., 2019); <sup>c</sup>: (Anoumbo, 2017)

d: (Deya-yang, 2016).

**Table S7.** Pooled regional prevalences of fascioliasis in cattle in Cameroon

| Region     | Number of study reports included in meta-analysis | Pooled prevalence (95%CI) | P-value |
|------------|---------------------------------------------------|---------------------------|---------|
| Adamawa    | 7                                                 | 41.5 (27.9-56.6)          | 0.006   |
| North West | 3                                                 | 2.4 (0.9-6.4)             |         |
| West       | 3                                                 | 11.5 (5.0-24.4)           |         |

**Table S8.** Characteristics and distribution of studies reporting trematodes other than fascioliasis in animals in Cameroon

| Characteristics    |                           | Cattle         | Small ruminants | Pigs           | poultry        | Total |
|--------------------|---------------------------|----------------|-----------------|----------------|----------------|-------|
|                    | Number of studies         | 7 <sup>a</sup> | 2 <sup>b</sup>  | 1 <sup>c</sup> | 1 <sup>d</sup> | 10    |
| Species Identified | Region                    |                |                 |                |                |       |
|                    | <i>Paramphistomum</i> spp | AD             | 2               | 1              | /              | 4     |
|                    |                           | W              | 1               | /              | /              | 1     |
|                    |                           | NW             | 1               | /              | /              | 1     |
|                    |                           | L              | /               | /              | /              | 1     |
|                    | <i>Echinostoma</i> spp    | AD             | /               | /              | 1              | 1     |
|                    | <i>Schistosoma bovis</i>  | AD             | 1               | /              | /              | 1     |
|                    | <i>Dicrocoelium hopes</i> | AD             | 2               | /              | /              | 2     |
| Samples Used       | Faeces                    |                |                 |                |                |       |
| Diagnostic methods | Coprology                 |                |                 |                |                |       |

Legend: <sup>a</sup>: (Dicko, 2015; Mamoudou et al., 2016d; Tchounkeu, 2017; Ekoual, 2018; Djuikwo-Teukeng et al., 2019; Mbotake, 2019; Chahdini et al., 2020); <sup>b</sup>: (Simeni, 2014; Anoumbo, 2017); <sup>c</sup>: (Deya-yang, 2016); <sup>d</sup>: (Bagari, 2019).

**Table S9.** Characteristics and distribution of studies reporting cysticercosis in Cameroon

| Characteristics | Pigs            | Cattle         | Small ruminants | Total |
|-----------------|-----------------|----------------|-----------------|-------|
|                 | 10 <sup>a</sup> | 1 <sup>b</sup> | 1 <sup>c</sup>  | 12    |

|                                   |   |   |   |   |
|-----------------------------------|---|---|---|---|
| Region                            |   |   |   |   |
| Adamawa                           | / | 1 | / | 1 |
| Centre                            | 1 | / | / | 1 |
| North West                        | 1 | / | / | 1 |
| North                             | 3 | / | 1 | 4 |
| West                              | 4 | / | / | 4 |
| Whole territory                   | 1 | / | / | 1 |
| Samples                           |   |   |   |   |
| Blood                             | 5 | 1 | 1 | 6 |
| Carcass                           | 4 |   |   | 5 |
| Diagnostic techniques             |   |   |   |   |
| ELISA                             | 5 | / | 1 | 6 |
| PM                                | 4 | 1 | / | 5 |
| Risk factors                      |   |   |   |   |
| Age of pigs                       | 1 | / | / | 1 |
| Rearing system                    | 2 | / | / | 2 |
| Presence of latrine               | 2 | / | / | 2 |
| Feeding                           | 1 | / | / | 1 |
| Farmer's knowledge of the disease | 2 | / | / | 2 |
| Farm hygiene                      | 3 | / | / | 3 |

Legnd: <sup>a</sup>: (Azebaze, 2000; Tchinda, 2000; Assana et al., 2001; Pouedet et al., 2002; Praet et al., 2009; Assana et al., 2010; Ngwing et al., 2012; Assana et al., 2019a; Assana et al., 2019b; Dongmo, 2019); <sup>b</sup>: (Manchang et al., 2016); <sup>c</sup>: (Djonmaila, 2016).

**Table S10.** Pooled regional prevalence of porcine cysticercosis in Cameroon

| Region | Number of study reports included in meta-analysis | Pooled prevalence (95%CI) | P-value |
|--------|---------------------------------------------------|---------------------------|---------|
| West   | 4                                                 | 3.2 (1.0-9.6)             | 0.25    |
| North  | 3                                                 | 21.5 (9.9-40.6)           |         |
| Centre | 2                                                 | 8.75 (6.3-12.6)           |         |

**Table S11.** Characteristics and distribution of studies reporting cestode diseases other than cysticercosis in Cameroon

| Disease or disease agent | Characteristics       | Cattle         | Small ruminants | Chicken        | Total |
|--------------------------|-----------------------|----------------|-----------------|----------------|-------|
|                          | Number of studies     | 4 <sup>a</sup> | 3 <sup>b</sup>  | 1 <sup>c</sup> | 7     |
| Moniezia                 | Region                |                |                 |                |       |
|                          | Adamawa               | 1              | 2               | /              | 1     |
|                          | West                  | 1              | 1               | /              | 3     |
|                          | South West            | 1              | /               | /              | 1     |
|                          | Littoral              | /              | /               | /              | 1     |
|                          | North West            | 1              | /               | /              | 1     |
|                          | Samples               | Faeces         |                 |                |       |
|                          | Diagnostic techniques | Coprology      |                 |                |       |
|                          | Region                |                |                 |                |       |
|                          | Adamawa               | /              | /               | 1              | 1     |

|                                  |      |                      |   |                    |           |
|----------------------------------|------|----------------------|---|--------------------|-----------|
| <i>Choanotenia</i>               | spp, | Sample               | / | /                  | Faeces    |
| <i>Amoebotenia</i>               | spp, | Diagnostic           | / | /                  | Coprology |
| <i>Hymenolepis</i>               | spp, | technique            |   |                    |           |
| <i>Railiottina</i> spp           |      |                      |   |                    |           |
|                                  |      | Region               |   |                    |           |
| Muscular and cerebral coenuruses |      | North                | / | 1                  | / 1       |
|                                  |      | Samples              | / | Tissue             | /         |
|                                  |      | Diagnostic technique | / | Optical microscopy | /         |

Legend: <sup>a</sup>: (Dicko, 2015; Mamoudou et al., 2016d; Kouam et al., 2018a; Mbotake, 2019); <sup>b</sup>: (Simeni, 2014; Tchouagoue, 2014; Djonmaila, 2016; Mbiakop, 2018); <sup>c</sup>: (Bagari, 2019).

**Table S12.** Characteristics and distribution of studies reporting nematodes in animals in Cameroon

| Characteristics               | Cattle          | Sheep          | Goats          | Pigs           | Chicken        | Total |
|-------------------------------|-----------------|----------------|----------------|----------------|----------------|-------|
| Number of studies             | 11 <sup>a</sup> | 3 <sup>b</sup> | 5 <sup>c</sup> | 7 <sup>d</sup> | 3 <sup>e</sup> | 25    |
| Region                        |                 |                |                |                |                |       |
| Adamawa                       | 5               | 1              | 1              | 1              | 1              | 8     |
| Centre                        | /               | /              | /              | 1              | /              | 1     |
| Far North                     | /               | /              | /              | 2              | /              | 2     |
| Littoral                      | /               | /              | 1              | /              | /              | 1     |
| North                         | 2               | /              | /              | /              | /              | 2     |
| North West                    | 2               | 1              | 1              | /              | 1              | 2     |
| South West                    | 1               | /              | /              | /              | 1              | 2     |
| West                          | 1               | 1              | 2              | 4              | /              | 7     |
| Species identified            |                 |                |                |                |                |       |
| Strongylida                   |                 |                |                |                |                |       |
| <i>Trichostrongylus</i> spp.  | 2               | 2              | 2              | /              | 1              | 4     |
| <i>Ostertagia</i> spp.        | 2               | 1              | 1              | /              | /              | 2     |
| <i>Hyostrongylus rubidium</i> | /               | /              | /              | /              | 2              | 2     |
| <i>Haemonchus</i> spp.        | 2               | 1              | 1              | /              | /              | 2     |
| <i>Cooperia</i> spp.          | 1               | /              | /              | /              | /              | 1     |
| <i>Nematodirus</i> spp.       | 1               | /              | /              | /              | /              | 1     |
| <i>Strongylus</i> spp.        | 7               | 1              | 4              | 3              | /              | 14    |
| <i>Oesophagostomum</i> spp.   | 2               | 1              | 1              | 2              | /              | 4     |
| <i>Bunostomum</i> spp.        | 1               | /              | /              | /              | /              | 1     |
| <i>Metastrongylus</i> spp.    | /               | /              | /              | /              | 1              | 1     |
| Rhabditoidea                  |                 |                |                |                |                |       |
| <i>Strongyloides</i> spp.     | 6               | 3              | 6              | 5              | 2              | 20    |
| Ascaridoidea                  |                 |                |                |                |                |       |
| <i>Ascaris</i> spp.           | /               | /              | /              | /              | 3              | 3     |
| <i>Toxocara</i> spp.          | 3               | /              | /              | 1              | /              | 4     |
| <i>Ascaridia</i> spp.         | /               | /              | /              | /              | 3              | 3     |
| <i>Heterakis</i> spp.         | /               | /              | /              | /              | 3              | 3     |
| Spirurida                     |                 |                |                |                |                |       |
| <i>Gongylonema</i> spp        | /               | /              | /              | /              | 1              | 1     |
| <i>Tetrameres</i> spp.        | /               | /              | /              | /              | 1              | 1     |
| <i>Onchocerca ochengi</i>     | 1               | /              | /              | /              | /              | 1     |

|                         |   |   |   |   |   |    |
|-------------------------|---|---|---|---|---|----|
| Enoplida                |   |   |   |   |   |    |
| <i>Trichuris</i> spp.   | 3 | 2 | 5 | 4 | 2 | 13 |
| <i>Capillaria</i> spp.  | / | / | / | / | 2 | 2  |
| <i>Trichinella</i> spp. | 1 | / | / | 1 | / | 1  |

Legend: <sup>a</sup>: (Chollet et al., 2000; Ntonifor et al., 2013; Dicko, 2015; Mamoudou et al., 2015c; Kouam et al., 2018a; Mbotake, 2019); <sup>b</sup>: (Ntonifor et al., 2013; Anoumbo, 2017; Mbiakop, 2018); <sup>c</sup>: (Chollet et al., 2000; Ntonifor et al., 2013; Simeni, 2014; Tchouagoue, 2014; Mamoudou et al., 2015c; Anoumbo, 2017; Mbiakop, 2018); <sup>d</sup>: (Byambas, 2001; Tchouankui, 2014; Deya-yang, 2016; Kombou, 2016; Metou, 2016; Kouam et al., 2018b; Djiojo, 2019); <sup>e</sup>: (Nghonjuyi et al., 2014; Bagari, 2019; Fokam, 2019).

**Table S13.** Characteristics and distribution of studies reporting coccidiosis in animals in Cameroon

| Characteristics   | Chicken        | Small ruminants | Pigs           | Cattle         | Total |
|-------------------|----------------|-----------------|----------------|----------------|-------|
| Number of studies | 8 <sup>a</sup> | 4 <sup>b</sup>  | 5 <sup>c</sup> | 3 <sup>d</sup> | 18    |
| Region            |                |                 |                |                |       |
| Adamawa           | 1              | /               | 1              | /              | 2     |
| Centre            | /              | 1               | /              | /              | 1     |
| Far North         | /              | /               | 1              | /              | 1     |
| Littoral          | /              | 1               | /              | /              | 1     |
| North             | /              | /               | /              | 1              | 1     |
| North West        | /              | /               | /              | 1              | 1     |
| South West        | 1              | /               | /              | /              | 1     |
| West              | 6              | 2               | 3              | 1              | 10    |
| Sample            | Faeces         |                 |                |                |       |
| Diagnosis         | Coprology      |                 |                |                |       |

Legend: <sup>a</sup>: (Nghonjuyi et al., 2014; Dongmo, 2017b; Mbiakop, 2018; Mbitkebeyo, 2018; Bagari, 2019; Fokam, 2019; Mbotake, 2019; Ngadjie, 2019); <sup>b</sup>: (Simeni, 2014; Tchouagoue, 2014; Tchouankui, 2014; Mbiakop, 2018); <sup>c</sup>: (Deyayang, 2016; Kombou, 2016; Metou, 2016; Kouam et al., 2018b; Djiojo, 2019); <sup>d</sup>: (Dicko, 2015; Mamoudou et al., 2015c; Mbotake, 2019).

**Table S14.** Species of ticks reported in Cameroon

| Characteristics                      | Cattle         | Small ruminants | Total |
|--------------------------------------|----------------|-----------------|-------|
| Number of studies                    | 7 <sup>a</sup> | 1 <sup>b</sup>  | 8     |
| Region                               |                |                 |       |
| Adamawa                              | 6              | /               | 6     |
| North West                           | 1              |                 | 1     |
| South                                | /              | /               | 1     |
| Species identified                   |                |                 |       |
| <i>Amblyomma variegatum</i>          | 4              | 1               | 5     |
| <i>Rh. microplus</i> ,               | 2              | /               | 2     |
| <i>Rh. Sanguineus</i>                | 1              | 1               | 2     |
| <i>Rhipicephalus</i> (Boophilus) spp | /              | 1               | 1     |
| <i>Rh. Evertsi</i>                   | 3              | /               | 3     |
| <i>Rh. geigy</i> ,                   | 3              | /               | 3     |
| <i>Rh. Annulatus</i>                 | 3              | /               | 3     |
| <i>Rh. Decoloratus</i>               | 3              | /               | 3     |
| <i>Rh. Appendiculatus</i>            | 1              | /               | 1     |
| Not identified                       | 2              | /               | 2     |
| <i>Hyalomma</i> spp                  | 2              | /               | 2     |
| <i>H. truncatum</i>                  | 2              | /               | 2     |
| Not identified                       | 2              | /               | 2     |
| <i>Haemophysalis laechei</i>         | 1              | /               | 1     |

Legend: <sup>a</sup>: (Achukwi et al., 2001; Awa et al., 2015; Mamoudou et al., 2015b; Mamoudou et al., 2016a; Mamoudou et al., 2016b; Manchang et al., 2016; Silatsa et al., 2019) ; <sup>b</sup>: (Kouam and Dongmo, 2018).



**Table S15.** Characteristics and distribution of studies reporting brucellosis in animals in Cameroon

| Species                      | Region     | Number of studies (references) | Sample              | Diagnostic technique | Risk factors                                                                                                              |
|------------------------------|------------|--------------------------------|---------------------|----------------------|---------------------------------------------------------------------------------------------------------------------------|
| Cattle <sup>a</sup>          | Adamawa    | 6                              | Blood: 5<br>Milk: 1 | RBPT: 1<br>ELISA: 5  | Presence of other species (1), herd size (1), locality (1), history of third trimester abortion (1), Husbandry system (2) |
|                              | North West | 6                              | Blood: 5<br>Milk: 1 | RBPT: 2<br>ELISA: 4  |                                                                                                                           |
|                              | West       | 2                              | Blood               | RBPT                 |                                                                                                                           |
|                              | East       | 1                              |                     | RBPT                 |                                                                                                                           |
| Small ruminants <sup>b</sup> | Adamawa    | 1                              | Blood               | ELISA                |                                                                                                                           |
| Pigs <sup>c</sup>            | Far North  | 1                              | Blood               | ELISA                |                                                                                                                           |
|                              | Littoral   | 1                              | Blood               | ELISA                |                                                                                                                           |
| Total                        | 7          | 12                             | Blood:11<br>Milk: 1 | RBPT: 2<br>ELISA: 12 |                                                                                                                           |

Legend : <sup>a</sup>: (Bayemi P. H. et al., 2009; Scolamacchia et al., 2010; Ojong, 2011; Bayemi et al., 2015; Kong et al., 2016; Ojong et al., 2016a; Awah-Ndukum et al., 2018a; Awah-Ndukum et al., 2018b; Loyem, 2019; Musallam et al., 2019); <sup>b</sup>: (Saya, 2017); <sup>c</sup>: (Moiffo, 2016).

**Table S16.** Regional pooled prevalence of brucellosis in cattle in Cameroon

| Region     | Number of study reports included in meta-analysis | Pooled prevalence (95%CI) | P-value |
|------------|---------------------------------------------------|---------------------------|---------|
| North West | 3                                                 | 5.8 (4.0-8.5)             | 0.39    |
| Adamawa    | 4                                                 | 8.4 (3.6-18.4)            |         |

**Table S17.** Characteristics and distribution of studies reporting tuberculosis in animals in Cameroon

|                     | Region     | Number of studies (references) | Sample                                        | Diagnostic technique                         |
|---------------------|------------|--------------------------------|-----------------------------------------------|----------------------------------------------|
| Cattle <sup>a</sup> | Adamawa    | 2                              | Carcass                                       | PM examination                               |
|                     | Far North  | 1                              | Carcass                                       | PM examination                               |
|                     | North      | 1                              | Carcass                                       | PM examination                               |
|                     | Littoral   | 4                              | Carcass                                       | PM examination                               |
|                     | Centre     | 2                              | Carcass                                       | PM examination                               |
|                     | West       | 2                              | Carcass                                       | PM examination                               |
|                     | North West | 4                              | Skin (intradermal injection): 2<br>Carcass: 2 | Tuberculin skin test: 2<br>PM examination: 2 |
| Goats <sup>b</sup>  | North      | 1                              | Skin(intradermal injection)                   | Tuberculin skin test                         |
| Total               |            | 11                             | Carcass: 8                                    | PM examination: 8                            |

Legend: <sup>a</sup>: (Awah-Ndukum et al., 2005; Awah-Ndukum et al., 2010b; Awah-Ndukum et al., 2012a; Awah-Ndukum et al., 2012b; Awah-Ndukum et al., 2012c; Francioli et al., 2013; Egbe et al., 2016; Ngoudjou, 2018; Yemelong, 2019; Francioli et al., 2013; Kouengoua, 2014; Egbe et al., 2016; Manchang et al., 2016); <sup>b</sup>: (Tchedele, 2017).

**Table S18.** Pooled regional prevalence of bovine tuberculosis

| Region     | Number of studies | Pooled prevalence (95%CI) | P-value |
|------------|-------------------|---------------------------|---------|
| North West | 5                 | 2.9 (1.7-4.7)             | 0.66    |
| West       | 2                 | 3.6 (2.3-5.5)             |         |
| Centre     | 2                 | 1.7 (0.4-7.1)             |         |
| Littoral   | 3                 | 2.9 (0.3-25.1)            |         |

**Table S19.** Characteristics and distribution of studies reporting salmonellosis, colibacillosis and campylobacteriosis in animals in Cameroon

| Infection          | Characteristics       | Chicken                                                                                                         | Cattle         | Pigs           | Total |
|--------------------|-----------------------|-----------------------------------------------------------------------------------------------------------------|----------------|----------------|-------|
| Salmonellosis      | Number of studies     | 3 <sup>a</sup>                                                                                                  | 2 <sup>b</sup> | 2 <sup>c</sup> | 6     |
|                    | Region                |                                                                                                                 |                |                |       |
|                    | Adamawa               | 1                                                                                                               | /              | /              | 1     |
|                    | Far North             | /                                                                                                               | 1              | /              | 1     |
|                    | West                  | 1                                                                                                               | /              | 1              | 1     |
|                    | South West            | /                                                                                                               | 1              | 1              | 1     |
|                    | Centre                | 1                                                                                                               | /              | /              | 1     |
|                    | Samples               | Faeces                                                                                                          |                |                |       |
|                    | Diagnostic techniques | Bacterial culture                                                                                               |                |                |       |
|                    | Number of studies     | 2d                                                                                                              | /              | /              | 2     |
| Colibacillosis     | Regions               |                                                                                                                 |                |                |       |
|                    | Centre                | 1                                                                                                               | /              | /              |       |
|                    | Adamawa               | 1                                                                                                               | /              | /              |       |
|                    | Samples               | Faeces                                                                                                          |                |                |       |
|                    | Diagnostic techniques | bacterial culture                                                                                               |                |                |       |
| Campylobacteriosis | Number of studies     | 2e                                                                                                              |                |                | 2     |
|                    | Region                |                                                                                                                 |                |                |       |
|                    | Centre                | 1                                                                                                               |                |                |       |
|                    | Samples               | Faeces, Neck skin                                                                                               | /              | /              |       |
|                    | Diagnostic techniques | Bacterial culture                                                                                               |                | /              |       |
| Risk factors       |                       | presence of rodents (1), farm hygiene (1), water supplies and methods of feed production (1), farm location (1) |                |                |       |

Legend : <sup>a</sup>: (Nzouankeu et al., 2010; Bouba, 2014; Kouam et al., 2019a) ; <sup>b</sup>: (Akoachere et al., 2009; Kochakbe, 2016); <sup>c</sup>: (Akoachere et al., 2009; Djuidje, 2019b); <sup>d</sup>: (Nzouankeu et al., 2010; Bouba, 2014); <sup>e</sup>: (Nzouankeu et al., 2010).

**Table S20.** Characteristics and distribution of studies reporting other bacterial diseases in animals in Cameroon

| Disease        | Host species | Region     | Studies included | Sample       | Diagnostic techniques  | Species identified                |
|----------------|--------------|------------|------------------|--------------|------------------------|-----------------------------------|
| Leptospirosis  | Cattle       | AD         | 2a               | Serum        | ELISA                  |                                   |
| Pasteurellosis | Cattle       | AD, FN, NW | 1b               | Serum        | hemagglutination tests | serotypes (A5, A7, B1, B6 et E6). |
| CCPP           | Goats        | N          | 1c               | Blood        | ELISA                  |                                   |
| CBPP           | Cattle       | N          | 1d               | Blood        | PCR                    |                                   |
| Anthrax        | Cattle       | N, E, FN   | 1e               | Blood        | PCR                    |                                   |
| Q Fever        | Cattle       | AD         | 1f               | Banked serum | ELISA                  |                                   |
| Mastitis       | Cattle       | AD         | 1g               | Milk         | Bacterial culture      | *                                 |
| Endometritis   | Cattle       | AD         | 1h               | Uterus       | Visual examination     | **                                |

Legend: <sup>a</sup>: (Scolamacchia et al., 2010; Ngu-Ngwa et al., 2020); <sup>b</sup>: (Njongmeta et al., 2001); <sup>c</sup>: (Haman, 2019); <sup>d</sup>: (Talba, 2014); <sup>e</sup>: (Pilo et al., 2011); <sup>f</sup>: (Scolamacchia et al., 2010); <sup>g</sup>: (Lewong, 2016); <sup>h</sup>: (Njanja, 2018); \* *Staphylococcus aureus*, *Staphylococcus* on Negative Coagulase *Escherichia coli*, *Enterococcus faecalis*; \*\* *Citrobacter braakii*, *Actinomyces pyogenes*, *Proteus mirabilis*, *Enterobacter cloacae*, *Escherichia coli*, *Aeromonas hydrophila*, *Bulkholderia cepacia*, *Providencia stuartii* and *Salmonella*.

**Table S21.** Characteristics and distributions of studies reporting FMD in animals in Cameroon

|                                  | Cattle         | Sheep          | Goats          | Pigs           | Total |
|----------------------------------|----------------|----------------|----------------|----------------|-------|
| Number of studies                | 9 <sup>a</sup> | 3 <sup>b</sup> | 2 <sup>c</sup> | 2 <sup>c</sup> | 13    |
| Region                           |                |                |                |                |       |
| Adamawa                          | 6              | 2              | 1              | 1              | 6     |
| East                             | 1              | /              | /              | /              | 1     |
| Far North                        | 1              | /              | /              | 1              | 2     |
| North                            | 1              | 1              | 1              | /              | 2     |
| Samples                          |                |                |                |                |       |
| Blood                            | 4              | 2              | 1              | 1              | 6     |
| Live animals                     | 3              | /              | /              | /              | 3     |
| Epithelial swabs                 | 2              | 1              | 1              | 1              | 2     |
| Probing swabs                    | 2              | 1              | /              | 1              | 2     |
| Diagnostic techniques            |                |                |                |                |       |
| ELISA                            | 4              | 2              | 1              | 1              | 6     |
| PCR                              | 3              | /              | /              | /              | 3     |
| Visual examination               | 5*             | 1              | 1              | 1              | 5     |
| Risk factors                     |                |                |                |                |       |
| Breed                            | 2              | /              | /              | /              | 2     |
| Breeding system                  | 2              | /              | /              | /              | 2     |
| vaccination history              | 1              | /              | /              | /              | 1     |
| Body condition                   | 1              | /              | 1              | /              | 1     |
| Presence of other animal species | 1              | /              | /              | /              | 1     |

|          |   |   |   |   |   |
|----------|---|---|---|---|---|
| Locality | / | / | 1 | 1 | 2 |
| Species  | / | / | 1 | / | 1 |

Legend: \*in two of these studies, diagnosis was based on herdsmen reports; <sup>a</sup>: (Bronsvoort et al., 2003; Bronsvoort et al., 2004; Bronsvoort et al., 2006; Kenton et al., 2014; Ludi et al., 2014; Modjo, 2014; Kuate, 2016; Manchang et al., 2016; Beloko, 2019; Sevidzem et al., 2019); <sup>b</sup>: (Bronsvoort et al., 2004; Nsangou, 2017; Sevidzem et al., 2019); <sup>c</sup>: (Bronsvoort et al., 2004; Nsangou, 2017); <sup>d</sup>: (Bronsvoort et al., 2004; Dongmo, 2016).

**Table S22.** Characteristics and distribution of studies reporting SRP in small ruminants in Cameroon

|                      | Sheep                                                                                                                                                        | Goats          | Total |
|----------------------|--------------------------------------------------------------------------------------------------------------------------------------------------------------|----------------|-------|
|                      | 3 <sup>a</sup>                                                                                                                                               | 2 <sup>b</sup> | 3     |
| Region               |                                                                                                                                                              |                |       |
| Adamawa              | 1                                                                                                                                                            | /              | 1     |
| North                | 1                                                                                                                                                            | /              | 1     |
| West                 | 1                                                                                                                                                            | 1              | 1     |
| Whole territory      | 1                                                                                                                                                            | 1              | 1     |
| Sample               | Blood                                                                                                                                                        |                |       |
| Diagnostic technique | ELISA                                                                                                                                                        |                |       |
| Risk factors         | mode of acquisition (1), vaccination status (1) sex (1), age(1), physiological state (1), agro-ecological zone (1), farming method (1) and field grazing (1) |                |       |

Legend : <sup>a</sup>: (Yongue, 2014; MINEPIA et al., 2016; Manglang, 2019) ; <sup>b</sup>: (Yongue, 2014; MINEPIA et al., 2016).

**Table S23.** Characteristics and distribution of studies reporting RVF in Cameroon

| Study                    | Region          |                           | Samples | Diagnostic techniques | Risk factors                                                                                                                        |
|--------------------------|-----------------|---------------------------|---------|-----------------------|-------------------------------------------------------------------------------------------------------------------------------------|
|                          | Cattle          | Small ruminants           |         |                       |                                                                                                                                     |
| (Bagninbom, 2016)        | NW, AD          | /                         | Blood   | ELISA                 | Interaction with other herds and wildlife species, the altitude of cattle rearing site, age, transhumance, grazing in flooded areas |
| (Poueme et al., 2019)    | /               | N                         | Blood   | ELISA                 | Locality, age, access to water                                                                                                      |
| (Risssmann et al., 2017) | N, FN, AD, C, S | N, FN, C, L, SW, W, NW, S | Blood   | ELISA                 | /                                                                                                                                   |

**Table S24.** Characteristics and distribution of studies reporting ASF and other viral diseases of pigs in Cameroon

| Disease                   | Region          | Sample               | Diagnostic techniques | Risk factors                                                                | References               |
|---------------------------|-----------------|----------------------|-----------------------|-----------------------------------------------------------------------------|--------------------------|
| ASF                       | AD, N, FN       | Blood, tissues       | PCR, ELISA            |                                                                             | (Nguena, 2017)           |
|                           | W               | Blood                | PCR                   | lack of footbath at the entrance, propagation by the farmer or veterinarian | (Nkana, 2014)            |
|                           | S, C, SW        | Blood, tissues       | PCR, ELISA            | /                                                                           | (Abdelrazak, 2019)       |
|                           | Whole territory | Blood, tissues, sera | PCR, ELISA            | /                                                                           | (Wade, 2019)             |
| Influenza A virus H1N1    | C, W, N, FN     | Nasal swabs and sera | PCR                   | Free-roaming                                                                | (Larison et al., 2014)   |
|                           | C, N            | Nasal swabs          | PCR                   |                                                                             | (Njabo et al., 2010)     |
| Hepatitis E virus         | N, W            | Blood                | ELISA                 | /                                                                           | (Modiyinji et al., 2018) |
|                           | NW, C, L        | Liver samples        | PCR                   | /                                                                           | (De Paula et al., 2013)  |
| Porcine hokovirus         | NW, L, C        | Liver samples        | PCR                   | /                                                                           | (Adlhoch et al., 2013)   |
| Novel Porcine bocaviruses | Not precise     | Faeces               | PCR                   | /                                                                           | (Ndze et al., 2013)      |

**Table S25.** Characteristics and distribution of studies reporting other viral diseases of cattle in Cameroon

|                                  | Study                 | Region | Sample | Diagnostic technique (s) | Risk factors                                                                                 |
|----------------------------------|-----------------------|--------|--------|--------------------------|----------------------------------------------------------------------------------------------|
| Bovine diarrhoea                 | viral 1 <sup>a</sup>  | AD     | Blood  | ELISA and PCR            | Proximity of herds to other animal species (goats, antelopes...) during grazing or otherwise |
| Infectious Rhinotracheitis (IBR) | Bovine 1 <sup>b</sup> | N      | Blood  | ELISA                    | Locality, sex and age                                                                        |
| Lumpy skin disease               | 1 <sup>c</sup>        | AD     | Skin   | AM examination           | /                                                                                            |

Legend: <sup>a</sup>: (Handel et al., 2011); <sup>b</sup>: (Abdoulaye, 2018); <sup>c</sup>: (Manchang et al., 2016).

**Table S26.** Characteristics and distribution of studies reporting viral diseases of poultry in Cameroon

| Disease               | Region          | Sample                                        | Diagnostic technique | Aetiological findings                             | Risk factors                                                                                                    | References            |
|-----------------------|-----------------|-----------------------------------------------|----------------------|---------------------------------------------------|-----------------------------------------------------------------------------------------------------------------|-----------------------|
| Avian influenza H5N1  | Whole territory | carcasses, swabs, eggs, tissues and droppings | avian flu rapid test | Epizooties fall within the genetic clade 2.3.2.1c | /                                                                                                               | (Wade et al., 2018)   |
|                       | West Centre     | /                                             | /                    | /                                                 | origin of feed, absence of sanitary care, origin of chicks, absence of foot bath and inadequate transport means | (Zangho, 2017)        |
| Avian influenza H5N8  | Far North       | /                                             | /                    |                                                   |                                                                                                                 | (Wade, 2017)          |
| Newcastle's disease   | NW              | Faeces, tracheal and cloacal swabs            | PCR                  | genotypes XIV, XVII and XVIII                     | /                                                                                                               | (Snoeck et al., 2013) |
| Chicken anaemia virus | Not precised    |                                               | Serology             | /                                                 | /                                                                                                               | (Snoeck et al., 2012) |

## Supplementary S1. Figures

### Parasitic diseases situation of livestock in Cameroon

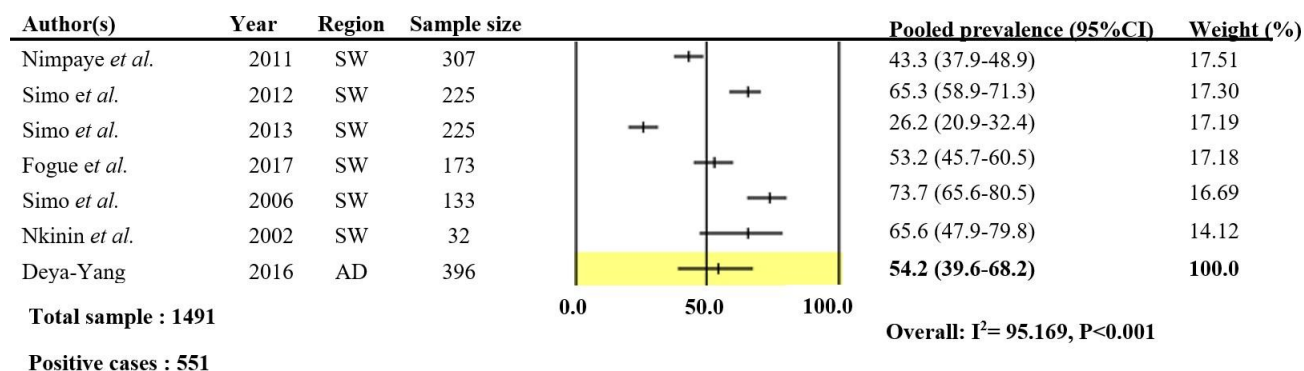

Note: weights are from random effects analysis

**Figure S1.** Forest plot of pooled prevalence of trypanosomiasis in pigs

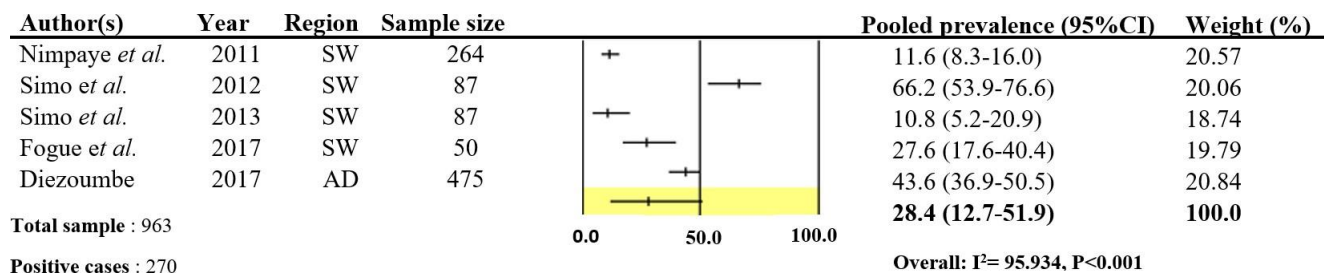

**Figure S2.** Forest plot of pooled prevalence of trypanosomiasis in small ruminants

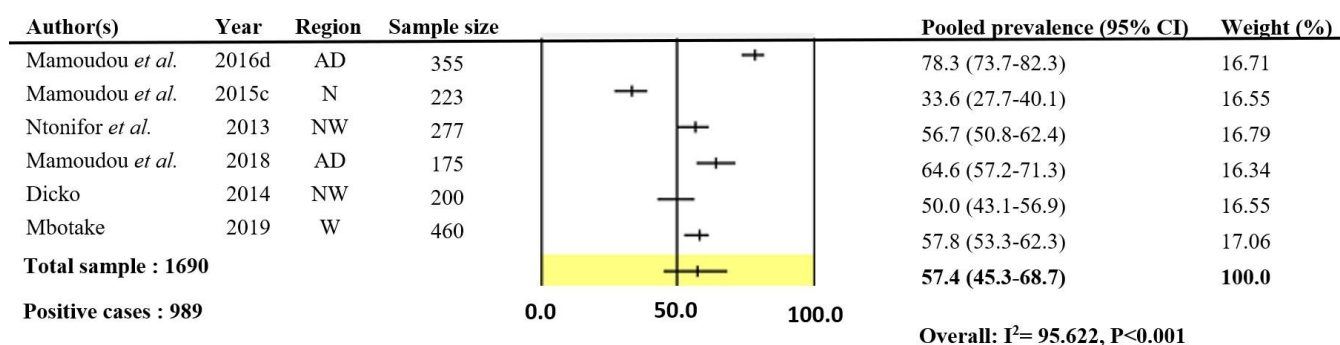

**Figure S3.** Forest plot of pooled prevalence of gastro intestinal parasites in cattle in Cameroon

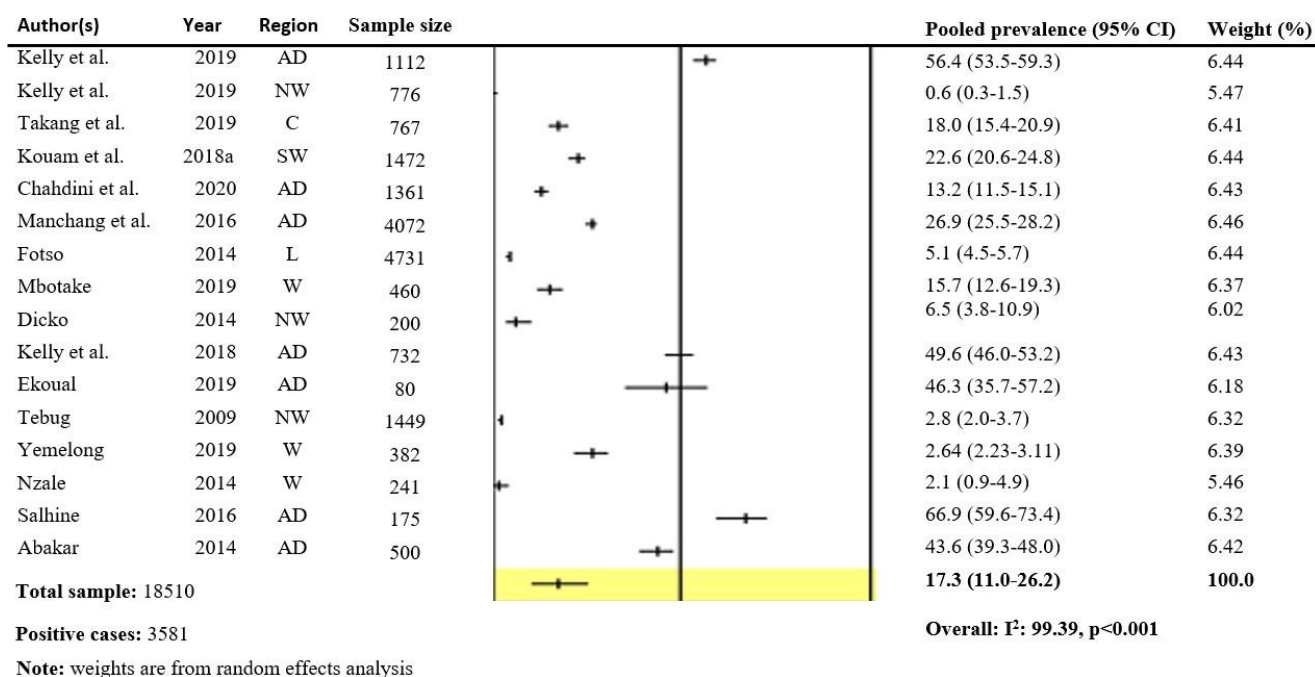

**Figure S4.** Forest plot of pooled prevalence of fascioliasis in cattle in Cameroon

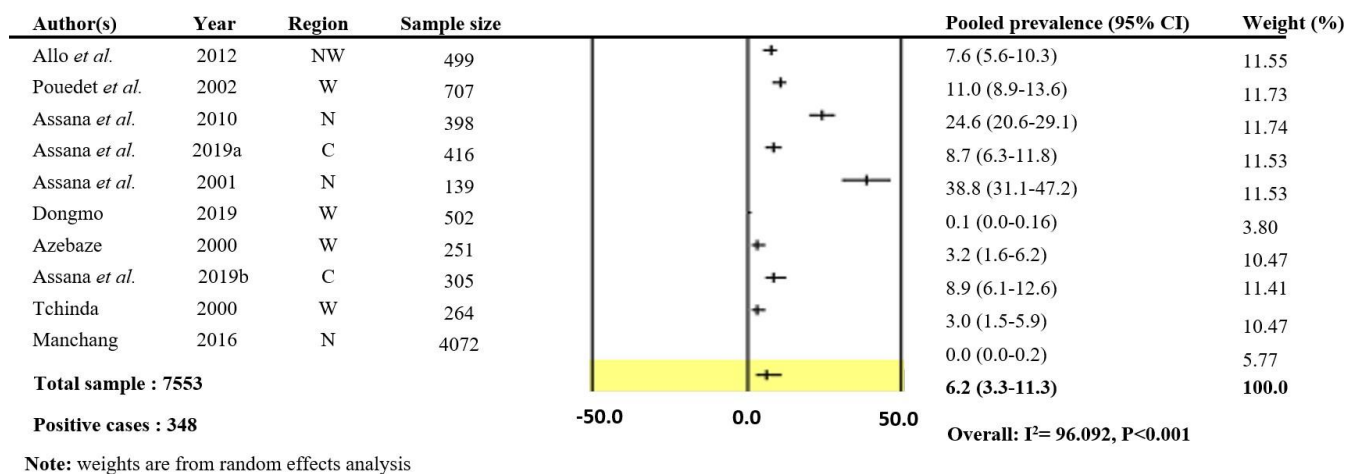

**Figure S5.** Forest plot of pooled prevalence of porcine cysticercosis in Cameroon

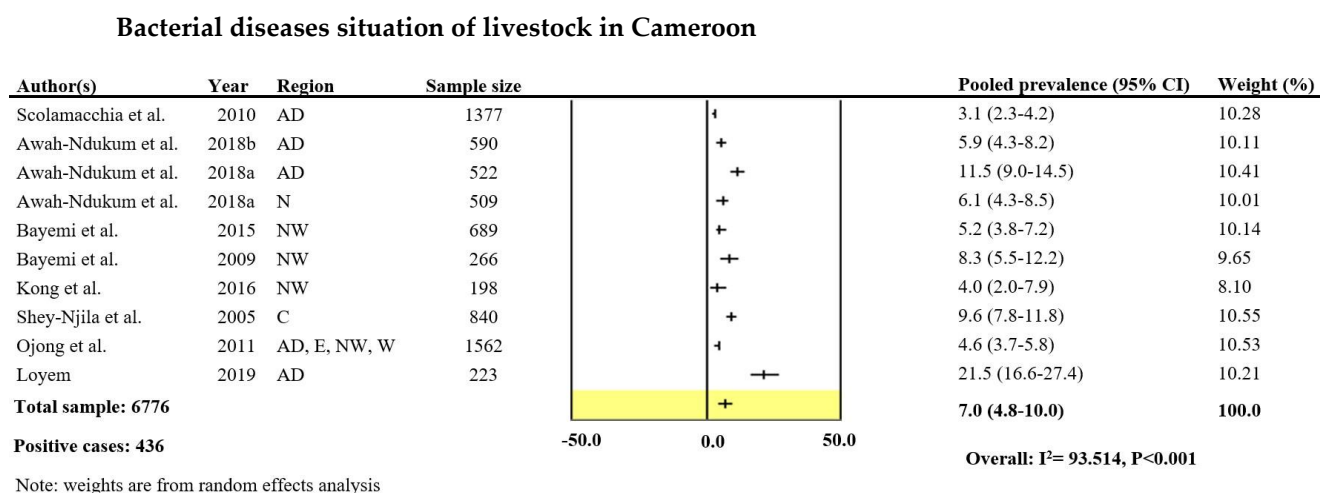

**Figure S6.** Forest plot of pooled prevalence of brucellosis in cattle in Cameroon



### Viral diseases situation of livestock in Cameroon

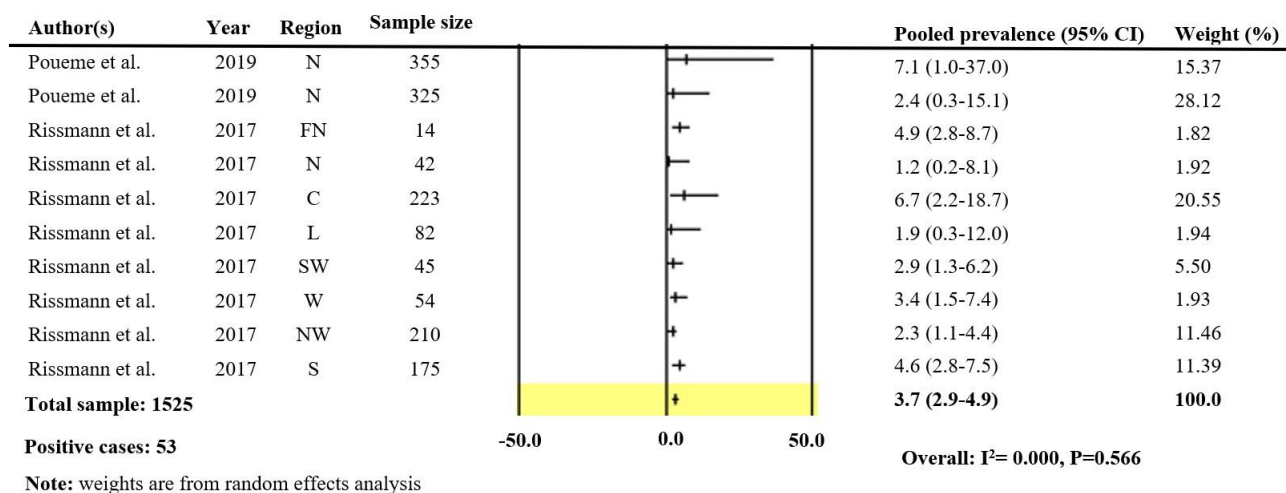

**Figure S7.** Forest plot of pooled prevalence of RVF in small ruminants in Cameroon

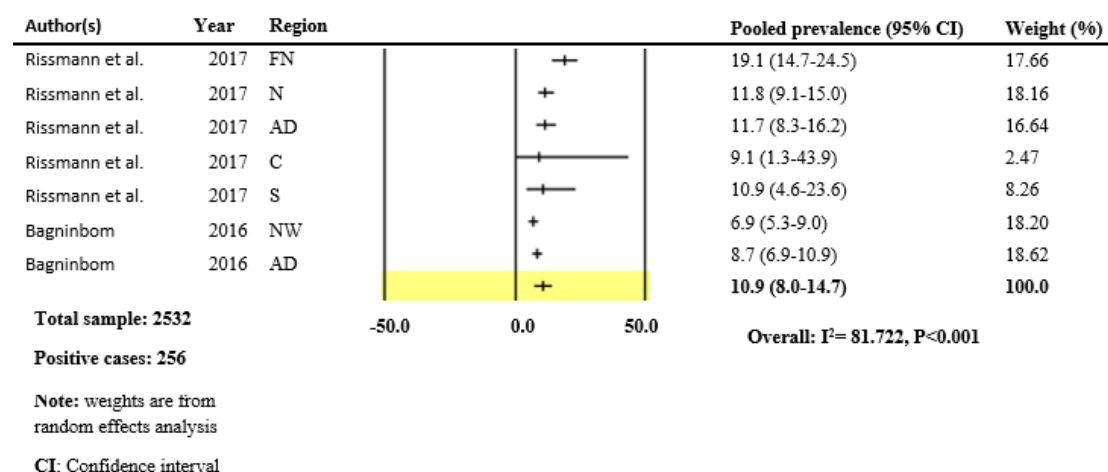

**Figure S8.** Forest plot of pooled prevalence of RVF in cattle in Cameroon

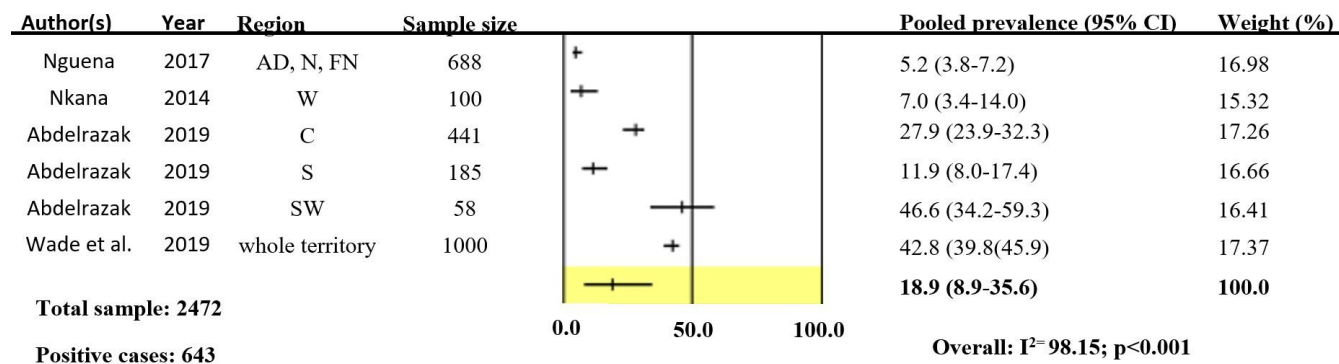

**Note:** weights are from random effects analysis

**Figure S9.** Forest plot of pooled prevalence of African swine fever in pigs in Cameroon

## Supplementary S2. Prisma check list used

| Section and Topic                                                                                                                                                                                                                                                                                                                                                                                                                                                                                                                                                                                                                                                                                                                                                                                                                                                                                                                                                                                                                                                                                                                                                                                                                                                                                                                                                                                                                                                                                                                                                                                                         | Item # | Checklist item                                                                         | Location where item is reported |
|---------------------------------------------------------------------------------------------------------------------------------------------------------------------------------------------------------------------------------------------------------------------------------------------------------------------------------------------------------------------------------------------------------------------------------------------------------------------------------------------------------------------------------------------------------------------------------------------------------------------------------------------------------------------------------------------------------------------------------------------------------------------------------------------------------------------------------------------------------------------------------------------------------------------------------------------------------------------------------------------------------------------------------------------------------------------------------------------------------------------------------------------------------------------------------------------------------------------------------------------------------------------------------------------------------------------------------------------------------------------------------------------------------------------------------------------------------------------------------------------------------------------------------------------------------------------------------------------------------------------------|--------|----------------------------------------------------------------------------------------|---------------------------------|
| <b>TITLE</b> Zoo-sanitary situation assessment, an initial step in country disease prioritization process: Systematic review and meta-analysis from 2000 to 2020 in Cameroon                                                                                                                                                                                                                                                                                                                                                                                                                                                                                                                                                                                                                                                                                                                                                                                                                                                                                                                                                                                                                                                                                                                                                                                                                                                                                                                                                                                                                                              |        |                                                                                        |                                 |
| Title                                                                                                                                                                                                                                                                                                                                                                                                                                                                                                                                                                                                                                                                                                                                                                                                                                                                                                                                                                                                                                                                                                                                                                                                                                                                                                                                                                                                                                                                                                                                                                                                                     | 1      | Identify the report as a systematic review.                                            | done                            |
| <b>ABSTRACT</b> To prevent and/or control infectious diseases in animal and human health, an appropriate surveillance system based on suitable up-to-date epidemiological data is required. The systematic review protocol was designed according to the PRISMA statement to looks at the available data on infectious diseases of livestock in Cameroon from 2000-2020. Data was searched through online databases. Grey literature comprised of dissertations and thesis from veterinary higher education institutions in Cameroon. A random-effects model was used to calculate pooled prevalence using Comprehensive Meta-analysis software. Based on disease prevalence, major infectious diseases of livestock in Cameroon were gastrointestinal parasitosis (57.4% in cattle, 67.2% in poultry, 88% in pigs), hemoparasites (21.6% in small ruminants, 19.7% in cattle), bovine pasteurellosis (55.5%), fowl salmonellosis (48.2%), small ruminant plague (39.7%), foot-and-mouth disease (34.5% in cattle) and African swine fever (18.9%). Furthermore, other important endemic zoonoses in the country included: Rift Valley fever (10.9% in cattle, 3.7% in small ruminants), brucellosis (7% in cattle, 8% in pigs), bovine tuberculosis (4.7% in cattle), hepatitis E virus (8.4% in pigs) and bovine leptospirosis (2.5%). Most of the retrieved research were carried out in the Adamawa, North-West and West regions of Cameroon. The evaluation of existing data as evidence, albeit publication-specific, is an important step towards the process of prioritizing animal diseases, including zoonoses. |        |                                                                                        |                                 |
| Abstract                                                                                                                                                                                                                                                                                                                                                                                                                                                                                                                                                                                                                                                                                                                                                                                                                                                                                                                                                                                                                                                                                                                                                                                                                                                                                                                                                                                                                                                                                                                                                                                                                  | 2      | See the PRISMA 2020 for Abstracts checklist.                                           | Respect of the prisma checklist |
| <b>INTRODUCTION</b>                                                                                                                                                                                                                                                                                                                                                                                                                                                                                                                                                                                                                                                                                                                                                                                                                                                                                                                                                                                                                                                                                                                                                                                                                                                                                                                                                                                                                                                                                                                                                                                                       |        |                                                                                        |                                 |
| Rationale                                                                                                                                                                                                                                                                                                                                                                                                                                                                                                                                                                                                                                                                                                                                                                                                                                                                                                                                                                                                                                                                                                                                                                                                                                                                                                                                                                                                                                                                                                                                                                                                                 | 3      | Describe the rationale for the review in the context of existing knowledge.            | Done                            |
| Objectives                                                                                                                                                                                                                                                                                                                                                                                                                                                                                                                                                                                                                                                                                                                                                                                                                                                                                                                                                                                                                                                                                                                                                                                                                                                                                                                                                                                                                                                                                                                                                                                                                | 4      | Provide an explicit statement of the objective(s) or question(s) the review addresses. | Done                            |

| METHODS                       |     |                                                                                                                                                                                                                                                                                                      |  |      |
|-------------------------------|-----|------------------------------------------------------------------------------------------------------------------------------------------------------------------------------------------------------------------------------------------------------------------------------------------------------|--|------|
| Eligibility criteria          | 5   | Specify the inclusion and exclusion criteria for the review and how studies were grouped for the syntheses.                                                                                                                                                                                          |  | Done |
| Information sources           | 6   | Specify all databases, registers, websites, organisations, reference lists and other sources searched or consulted to identify studies. Specify the date when each source was last searched or consulted.                                                                                            |  | Done |
| Search strategy               | 7   | Present the full search strategies for all databases, registers and websites, including any filters and limits used.                                                                                                                                                                                 |  | Done |
| Selection process             | 8   | Specify the methods used to decide whether a study met the inclusion criteria of the review, including how many reviewers screened each record and each report retrieved, whether they worked independently, and if applicable, details of automation tools used in the process.                     |  | Done |
| Data collection process       | 9   | Specify the methods used to collect data from reports, including how many reviewers collected data from each report, whether they worked independently, any processes for obtaining or confirming data from study investigators, and if applicable, details of automation tools used in the process. |  | Done |
| Data items                    | 10a | List and define all outcomes for which data were sought. Specify whether all results that were compatible with each outcome domain in each study were sought (e.g. for all measures, time points, analyses), and if not, the methods used to decide which results to collect.                        |  | Done |
|                               | 10b | List and define all other variables for which data were sought (e.g. participant and intervention characteristics, funding sources). Describe any assumptions made about any missing or unclear information.                                                                                         |  | Done |
| Study risk of bias assessment | 11  | Specify the methods used to assess risk of bias in the included studies, including details of the tool(s) used, how many reviewers assessed each study and whether they worked independently, and if applicable, details of automation tools used in the process.                                    |  | Done |
| Effect measures               | 12  | Specify for each outcome the effect measure(s) (e.g. risk ratio, mean difference) used in the synthesis or presentation of results.                                                                                                                                                                  |  | Done |
| Synthesis methods             | 13a | Describe the processes used to decide which studies were eligible for each synthesis (e.g. tabulating the study intervention characteristics and comparing against the planned groups for each synthesis (item #5)).                                                                                 |  | Done |
|                               | 13b | Describe any methods required to prepare the data for presentation or synthesis, such as handling of missing summary statistics, or data conversions.                                                                                                                                                |  | Done |
|                               | 13c | Describe any methods used to tabulate or visually display results of individual studies and syntheses.                                                                                                                                                                                               |  | Done |
|                               | 13d | Describe any methods used to synthesize results and provide a rationale for the choice(s). If meta-analysis was performed, describe the model(s), method(s) to identify the presence and extent of statistical heterogeneity, and software package(s) used.                                          |  | Done |
|                               | 13e | Describe any methods used to explore possible causes of heterogeneity among study results (e.g. subgroup analysis, meta-regression).                                                                                                                                                                 |  | Done |
|                               | 13f | Describe any sensitivity analyses conducted to assess robustness of the synthesized results.                                                                                                                                                                                                         |  | Done |
| Reporting bias assessment     | 14  | Describe any methods used to assess risk of bias due to missing results in a synthesis (arising from reporting biases).                                                                                                                                                                              |  | Done |
| Certainty assessment          | 15  | Describe any methods used to assess certainty (or confidence) in the body of evidence for an outcome.                                                                                                                                                                                                |  | Done |

| RESULTS                       |     |                                                                                                                                                                                                                                                                                      |      |
|-------------------------------|-----|--------------------------------------------------------------------------------------------------------------------------------------------------------------------------------------------------------------------------------------------------------------------------------------|------|
| Study selection               | 16a | Describe the results of the search and selection process, from the number of records identified in the search to the number of studies included in the review, ideally using a flow diagram.                                                                                         | Done |
|                               | 16b | Cite studies that might appear to meet the inclusion criteria, but which were excluded, and explain why they were excluded.                                                                                                                                                          | Done |
| Study characteristics         | 17  | Cite each included study and present its characteristics.                                                                                                                                                                                                                            | Done |
| Risk of bias in studies       | 18  | Present assessments of risk of bias for each included study.                                                                                                                                                                                                                         | Done |
| Results of individual studies | 19  | For all outcomes, present, for each study: (a) summary statistics for each group (where appropriate) and (b) an effect estimate and its precision (e.g. confidence/credible interval), ideally using structured tables or plots.                                                     | Done |
| Results of syntheses          | 20a | For each synthesis, briefly summarise the characteristics and risk of bias among contributing studies.                                                                                                                                                                               | Done |
|                               | 20b | Present results of all statistical syntheses conducted. If meta-analysis was done, present for each the summary estimate and its precision (e.g. confidence/credible interval) and measures of statistical heterogeneity. If comparing groups, describe the direction of the effect. | Done |
|                               | 20c | Present results of all investigations of possible causes of heterogeneity among study results.                                                                                                                                                                                       | Done |
|                               | 20d | Present results of all sensitivity analyses conducted to assess the robustness of the synthesized results.                                                                                                                                                                           | Done |
| Reporting biases              | 21  | Present assessments of risk of bias due to missing results (arising from reporting biases) for each synthesis assessed.                                                                                                                                                              | Done |
| Certainty of evidence         | 22  | Present assessments of certainty (or confidence) in the body of evidence for each outcome assessed.                                                                                                                                                                                  | Done |

| DISCUSSION                                     |     |                                                                                                                                                                                                                                            |                       |
|------------------------------------------------|-----|--------------------------------------------------------------------------------------------------------------------------------------------------------------------------------------------------------------------------------------------|-----------------------|
| Discussion                                     | 23a | Provide a general interpretation of the results in the context of other evidence.                                                                                                                                                          | Done                  |
|                                                | 23b | Discuss any limitations of the evidence included in the review.                                                                                                                                                                            | Done                  |
|                                                | 23c | Discuss any limitations of the review processes used.                                                                                                                                                                                      | Done                  |
|                                                | 23d | Discuss implications of the results for practice, policy, and future research.                                                                                                                                                             | Done                  |
| OTHER INFORMATION                              |     |                                                                                                                                                                                                                                            |                       |
| Registration and protocol                      | 24a | Provide registration information for the review, including register name and registration number, or state that the review was not registered.                                                                                             | Not registered        |
|                                                | 24b | Indicate where the review protocol can be accessed, or state that a protocol was not prepared.                                                                                                                                             |                       |
|                                                | 24c | Describe and explain any amendments to information provided at registration or in the protocol.                                                                                                                                            |                       |
| Support                                        | 25  | Describe sources of financial or non-financial support for the review, and the role of the funders or sponsors in the review.                                                                                                              | IMMANA                |
| Competing interests                            | 26  | Declare any competing interests of review authors.                                                                                                                                                                                         | No competing interest |
| Availability of data, code and other materials | 27  | Report which of the following are publicly available and where they can be found: template data collection forms; data extracted from included studies; data used for all analyses; analytic code; any other materials used in the review. | Not define            |

**Supplementary S3.** Study quality assessment form and decision

**Question 1:** was the basic data, including study period, sample type, disease condition, and study site, provided?

**Question 2:** Were the study participants recruited appropriately?

**Question 3:** Was the sample size representative of the target population (for cross-sectional studies alone)?

**Question 4:** Were the study subjects and setting described in detail?

**Question 5:** Was the data analysis conducted with sufficient coverage of the identified pathogen?

**Question 6:** Were all important confounding factors/subgroups/differences identified and accounted for?

**Question 7:** Were objectives and standard criteria used to measure the condition?

**Question 8:** Was the condition measured reliably (with valid methods and trained personnel)?

9

Response coe: **Y**=yes; **N**=no”, **I**=irrelevant; **U**=unclear 11

| N° | Study                                                                                                                                                                                                                                                                                                                                                               | Question number |   |   |   |   |   |   |   | Decision to include |
|----|---------------------------------------------------------------------------------------------------------------------------------------------------------------------------------------------------------------------------------------------------------------------------------------------------------------------------------------------------------------------|-----------------|---|---|---|---|---|---|---|---------------------|
|    |                                                                                                                                                                                                                                                                                                                                                                     | 1               | 2 | 3 | 4 | 5 | 6 | 7 | 8 |                     |
| 1. | Abakar, A. A. (2014). <i>Prévalence et impacts économiques de la fasciolose à l'abattoir municipal de Ngaoundéré [Unpublished doctoral dissertation]</i> . (Doctor of Veterinary Medicine), School of Veterinary Medicine and Sciences, University of Ngaoundere, Cameroon.                                                                                         | Y               | Y | U | U | Y | Y | Y | Y | High                |
| 2. | Abanda, B., Paguem A., Abdoulmoumini M., Manchang T. K., Renz A., & Eisenbarth A. (2019). Molecular identification and prevalence of tick-borne pathogens in zebu and taurine cattle in North Cameroon. <i>Parasites &amp; Vectors</i> , 12(448), <a href="https://doi.org/10.1186/s13071-13019-13699-x">https://doi.org/10.1186/s13071-13019-13699-x</a> .         | Y               | Y | U | U | Y | Y | Y | Y | High                |
| 3. | Abdelrazak, A. (2019). <i>Etude épidémiologique de la Peste Porcine Africaine dans les régions du Centre, du Sud et du Sud-Ouest Cameroun, caractérisation moléculaire du virus et essais thérapeutiques [Unpublished doctoral dissertation]</i> . (Doctor of Veterinary Medicine), School of Veterinary Medicine and Sciences, University of Ngaoundere, Cameroon. | Y               | Y | Y | Y | Y | Y | Y | Y | High                |
| 4. | Abdoulaye, M. R. (2018). <i>Séroprévalence et facteurs de risque de la Rhinotrachéite Infectieuse Bovine dans le Département de la Bénoué (Région du Nord, Cameroun [Unpublished doctoral dissertation])</i> . (Doctor in Veterinary Medicine), School of Veterinary medicine and Sciences, University of Ngaoundere, Cameroon.                                     | Y               | Y | Y | Y | N | Y | Y | Y | High                |

|     |                                                                                                                                                                                                                                                                                                                                                                                                                                                                       |   |   |   |   |   |   |   |   |        |
|-----|-----------------------------------------------------------------------------------------------------------------------------------------------------------------------------------------------------------------------------------------------------------------------------------------------------------------------------------------------------------------------------------------------------------------------------------------------------------------------|---|---|---|---|---|---|---|---|--------|
| 5.  | Achukwi, M. D., & Musongong, G. A. (2009). Trypanosomosis in the Doayo/Namchi (Bos taurus) and zebu White Fulani (Bos indicus) cattle in Faro Division, North Cameroon. <i>Journal of Applied Biosciences</i> 15, 807-814.                                                                                                                                                                                                                                            | Y | N | I | Y | Y | Y | I | Y | High   |
| 6.  | Adlhoch, C., Kaiser M., Manchang T. K., Schwarz N. G., Ulrich M., de Paula V. S., & Ellerbrok H. (2013). Porcine Hokovirus in Domestic Pigs, Cameroon. <i>Emerging Infectious Diseases</i> , 19(12), 2060-2062 <a href="http://dx.doi.org/2010.3201/eid1912.130891">http://dx.doi.org/2010.3201/eid1912.130891</a> .                                                                                                                                                  | Y | N | I | U | Y | Y | I | Y | High   |
| 7.  | Akoachere, J.-F., Tanih N. F., Ndip L. M., & N., N. R. (2009). Phenotypic Characterization of Salmonella Typhimurium Isolates from Food-animals and Abattoir Drains in Buea, Cameroon. <i>Journal of Health, Population and Nutrition</i> , 27 (5), 612-618.                                                                                                                                                                                                          | Y | U | I | U | N | Y | I | Y | High   |
| 8.  | Aliyou, H. (2014). <i>Etude épidémiologique de la trypanosomose bovine dans le mayo-rey région du nord cameroun [Unpublished doctoral dissertation]</i> . (Doctor of Veterinary Medicine), School of Veterinary Medicine and Sciences, University of Ngaoundere, Cameroon.                                                                                                                                                                                            | Y | Y | Y | Y | Y | Y | Y | Y | High   |
| 9.  | An'naguil, T. I. (2017). <i>Identification, prévalence et facteurs de risques des hémoparasites transmis par les tiques aux petits ruminants dans le Département de la Bénoué (Région du Nord Cameroun [Unpublished doctoral dissertation])</i> . (Doctor of Veterinary Medicine), School of Veterinary Medicine and Sciences, University of Ngaoundere, Cameroon.                                                                                                    | Y | Y | Y | Y | Y | Y | Y | Y | High   |
| 10. | Anoumbo, A. M. A. (2017). <i>Prévalence et intensité d'infestation des helminthes gastro-intestinaux et hémoparasites des petits ruminants en fonction des types d'élevages dans le département de la Vina [Unpublished doctoral dissertation]</i> . (Doctor of Veterinary Medicine), School of Veterinary medicine and Sciences, Cameroon.                                                                                                                           | Y | Y | U | U | Y | Y | Y | Y | High   |
| 11. | Assana, E., Amadou F., Thys E., Lightowlers M. W., Zoli A. P., Dorny P., & Geerts S. (2010). Pig-farming systems and porcine cysticercosis in the north of Cameroon. <i>Journal of helminthology</i> (84), 441–446.                                                                                                                                                                                                                                                   | Y | Y | Y | Y | Y | Y | N | Y | High   |
| 12. | Assana, E., Awah-Ndukum J., Djonmaila D. J., & Zoli P. A. (2019). Prevalence of porcine Taenia solium and Taenia hydatigena cysticercosis in Cameroon. <i>Preventive Veterinary Medicine</i> , 169, 104690.                                                                                                                                                                                                                                                           | Y | Y | Y | U | Y | Y | N | Y | High   |
| 13. | Assana, E., Awah-Ndukum J., Djonmaila J. D., Djiatche H. D., Awé C., Manchang T. K., & Zoli P. A. (2019). A comparison of Taenia solium and Taenia hydatigena infection in pigs using serological diagnosis and post-mortem inspection methods in Benoué division, North Cameroon. <i>Veterinary Parasitology: Regional Studies and Reports</i> , 17, 100306, <a href="https://doi.org/10.1016/j.vprsr.2019.100306">https://doi.org/10.1016/j.vprsr.2019.100306</a> . | Y | Y | Y | Y | N | Y | U | Y | High   |
| 14. | Assana, E., Zoli P. A., Sadou H. A., Nguekam, Vondou L., Pouedet M. S. R., Geerts S. (2001). Prévalence de la cysticercose porcine dans le Mayo-Danay (Nord Cameroun) et le Mayo-Kebbi (sud-ouest du Tchad). <i>Revue d'élevage et de médecine vétérinaire des pays tropicaux</i> , 54(2), 123-127.                                                                                                                                                                   | Y | Y | Y | U | Y | Y | N | Y | High   |
| 15. | Awa, D. N., & Ndamkou, C. N. (2006). Response of Trypanosoma vivax and Trypanosoma congolense in zebu cattle in North Cameroon to prophylactic treatment with two formulations of isometamidium. <i>Preventive Veterinary Medicine</i> , 76, 90-96.                                                                                                                                                                                                                   | Y | Y | Y | Y | Y | Y | Y | Y | High   |
| 16. | Awa, D. N., Adakal H., Luogbou N. D. D., Wachong K. H., Leinyuy I., & Achukwi M. D. (2015). Cattle ticks in Cameroon: Is Rhipicephalus (Boophilus) microplus absent in Cameroon and the Central African region? <i>Ticks and Tick-borne Diseases</i> , 6, 117-122 <a href="http://dx.doi.org/10.1016/j.ttbdis.2014.1010.1005">http://dx.doi.org/10.1016/j.ttbdis.2014.1010.1005</a> .                                                                                 | Y | I | I | Y | Y | Y | I | Y | High   |
| 17. | Awa, D. N., Ngagnou A., Tefiang E., Yaya D., & Njoya A. (2002). Post-vaccination and colostral peste des petits ruminants antibody dynamics in research flocks of kirdi goats and foieulbe sheep of North Cameroon. <i>Preventive Veterinary Medicine</i> , 55, 265-271                                                                                                                                                                                               | Y | N | U | N | Y | N | Y | Y | Medium |

|     |                                                                                                                                                                                                                                                                                                                                                                               |   |   |   |   |   |   |   |      |
|-----|-------------------------------------------------------------------------------------------------------------------------------------------------------------------------------------------------------------------------------------------------------------------------------------------------------------------------------------------------------------------------------|---|---|---|---|---|---|---|------|
| 18. | Awah-Ndukum, J., Kudi A. C., Bah G. S., Bradley G., Tebug S. F., Dickmu P. L., & Aghari W. N. (2012). Bovine Tuberculosis in Cattle in the Highlands of Cameroon: Seroprevalence Estimates and Rates of Tuberculin Skin Test Reactors at Modified Cut-Offs. <i>Veterinary Medicine International</i> , doi:10.1155/2012/798502.                                               | Y | Y | Y | Y | Y | Y | Y | High |
| 19. | Awah-Ndukum, J., Kudi A. C., Bradley G., Smith N. H., Ane-Anyangwe I., Cho-Ngwa F., & Titanji K. V. P. (2013). Molecular genotyping of Mycobacterium bovis isolated from cattle tissues in the North West Region of Cameroon. <i>Tropical Animal Health and Production</i> , 45, 829–836.                                                                                     | Y | Y | U | N | Y | Y | Y | High |
| 20. | Awah-Ndukum, J., Kudi A. C., Bradley G., Smith N. H., Ane-Anyangwe I., Cho-Ngwa F., & Titanji V. P. K. (2012). Molecular genotyping of Mycobacterium bovis isolated from cattle tissues in the North West Region of Cameroon. <i>Trop Anim Health Prod</i> (45), 829–836                                                                                                      | Y | Y | Y | Y | Y | Y | Y | High |
| 21. | Awah-Ndukum, J., Kudi C., Bradley G., Ane-Anyangwe I. N., Fon-Tebug S., & J., T. (2010). Prevalence of Bovine Tuberculosis in Abattoirs of the Littoral and Western Highland Regions of Cameroon: A Cause for Public Health Concern. <i>Veterinary Medicine International</i> , 2010, doi:10.4061/2010/495015.                                                                | Y | Y | N | U | Y | Y | Y | High |
| 22. | Awah-Ndukum, J., Kudi C., Bradley G., Ane-Anyangwe I. N., Fon-Tebug S., & J., T. (2010). Prevalence of Bovine Tuberculosis in Abattoirs of the Littoral and Western Highland Regions of Cameroon: A Cause for Public Health Concern. <i>Veterinary Medicine International</i> , 2010, doi:10.4061/2010/495015.                                                                | Y | Y | Y | Y | N | Y | Y | High |
| 23. | Awah-Ndukum, J., Kudi, A. C., Bah, G. S., Bradley, G., Tebug, S. F., Dickmu, P. L., Njakoi, H. N., & Aghari, W. N. (2012). Bovine tuberculosis in cattle in the highlands of cameroon: seroprevalence estimates and rates of tuberculin skin test reactors at modified cut-offs. <i>Veterinary medicine international</i> , 2012, 798502. https://doi.org/10.1155/2012/798502 | Y | N | Y | Y | Y | Y | N | High |
| 24. | Awah-Ndukum, J., Mouiche M. M. M., Bayang H. N., Ngu Ngwa V., Assana E., Feussom K. J. M., & Zoli P. A. (2018). Seroprevalence and Associated Risk Factors of Brucellosis among Indigenous Cattle in the Adamawa and North Regions of Cameroon. <i>Veterinary Medicine International</i> , 2018, https://doi.org/10.1155/2018/3468596.                                        | Y | N | Y | Y | Y | Y | Y | High |
| 25. | Awah-Ndukum, J., Mouiche M. M. M., Kouonmo-Ngnoy L., Bayang H. N., Manchang T. K., Poueme R. S. N., Zoli P. A. (2018). Seroprevalence and risk factors of brucellosis among slaughtered indigenous cattle, abattoir personnel and pregnant women in Ngaoundéré, Cameroon. <i>BMC Infectious Diseases</i> 18, 611.                                                             | Y | Y | Y | Y | Y | Y | Y | High |
| 26. | Awah-Ndukum, J., Tchoumboue J., & Niba A. T. (2005). Prevalence of bovine tuberculosis at the SODEPA Douala abattoir Cameroon (1995-2003). <i>Cameroon Journal of Experimental Biology</i> , 1(02), 116-120.                                                                                                                                                                  | Y | N | Y | Y | Y | Y | Y | High |
| 27. | Bagari, I. S. (2019). <i>Inventaire des helminthes digestifs et des coccidies chez les poules locales dans les lieux d'abattage de la ville de Ngaoundéré [Unpublished doctoral dissertation]</i> . (Doctor of Veterinary Medicine), School of Veterinary Medicine and Sciences, University of Ngaoundere, Cameroon.                                                          | Y | Y | U | Y | Y | N | Y | High |
| 28. | Bagninbom, J. M. (2016). <i>Séroprévalence et facteurs de risque de la fièvre de la vallée du Rift chez les bovins dans les hautes terres du Cameroun [Unpublished doctoral dissertation]</i> . (Doctor of Veterinary Medicine), School of Veterinary Medicine and Sciences, University of Ngaoundere, Cameroon.                                                              | Y | Y | Y | Y | Y | Y | Y | High |



[illegible]

[illegible]



[illegible]

|     |                                                                                                                                                                                                                                                                                                                                                                                                                                                       |   |   |   |   |   |   |   |        |
|-----|-------------------------------------------------------------------------------------------------------------------------------------------------------------------------------------------------------------------------------------------------------------------------------------------------------------------------------------------------------------------------------------------------------------------------------------------------------|---|---|---|---|---|---|---|--------|
| 75. | Kouonmo, N. L. (2016). <i>Séroprévalence et facteurs de risue de la brucellose bovine et humaine dans la ville de Ngaoundéré [Unpublished doctoral dissertation]</i> . (Doctor of Veterinary Medicine), School of Veterinary Medicine and Sciences, University of Ngaoundere, Cameroon.                                                                                                                                                               | Y | Y | Y | Y | Y | Y | Y | High   |
| 76. | Kuate, W. B. V. (2016). <i>Prévalence et facteurs de risque par les éleveurs de la fièvre aphteuse chez les bovins dans les départements de la Vina, du Diamare et du Logone-et-Chari [Unpublished doctoral dissertation]</i> . (Doctor of Veterinary Medicine), School of Veterinary Medicine and Sciences, University of Ngaoundere, Cameroon.                                                                                                      | Y | Y | N | N | Y | Y | Y | High   |
| 77. | Larison, B., Njabo, K. Y., Chasar, A., Fuller, T., Harrigan, R. J., & Smith, T. B. (2014). Spillover of pH1N1 to swine in Cameroon: an investigation of risk factors. <i>BMC veterinary research</i> , 10, 55. <a href="https://doi.org/10.1186/1746-6148-10-55">https://doi.org/10.1186/1746-6148-10-55</a>                                                                                                                                          | Y | Y | U | I | Y | Y | N | High   |
| 78. | LeBreton, M., Umlauf S Djoko C. F., Peter Daszak, D. S. B., ¶, Paul Yemgai Kwenkam, & Wolfe, a. N. D. (2006). Rift Valley Fever in Goats, Cameroon. <i>Emerging Infectious Diseases</i> , 12(4), 702-703.                                                                                                                                                                                                                                             | Y | Y | U | U | Y | N | Y | Medium |
| 79. | Lewong, H. H. (2016). <i>Prévalences des mammites subcliniques chez les vaches en lactation dans la ville de Ngaoundéré et ses environs [Unpublished doctoral dissertation]</i> . (Doctor of Veterinary Medicine), School of Veterinary Medicine and Sciences, University of Ngaoundere, Cameroon.                                                                                                                                                    | Y | Y | Y | Y | Y | Y | Y | High   |
| 80. | Loyem, F. E. (2019). <i>Comparison of serological status and occurrence of reproductive disorders in Brucella positive and negative herds in Vina division, adamawa region (Cameroun) [Unpublished doctoral dissertation]</i> . (Doctor in Veterinary Medicine), School of Veterinary Medicine and Sciences, University of Ngaoundere, Cameroon.                                                                                                      | Y | Y | I | Y | Y | Y | I | High   |
| 81. | Loyem, F. E. (2019). <i>Comparison of serological status and occurrence of reproductive disorders in Brucella positive and negative herds in Vina division, adamawa region (Cameroun) [Unpublished doctoral dissertation]</i> . (Doctor in Veterinary Medicine), School of Veterinary Medicine and Sciences, University of Ngaoundere, Cameroon.                                                                                                      | Y | Y | U | Y | N | Y | I | High   |
| 82. | Ludi, A., Ahmed, Z., Pomeroy, L. W., Pauszek, S. J., Smoliga, G. R., Moritz, M., Dickmu, S., Abdoulkadiri, S., Arzt, J., Garabed, R., & Rodriguez, L. L. (2016). Serotype Diversity of Foot-and-Mouth-Disease Virus in Livestock without History of Vaccination in the Far North Region of Cameroon. <i>Transboundary and emerging diseases</i> , 63(1), e27–e38. <a href="https://doi.org/10.1111/tbed.12227">https://doi.org/10.1111/tbed.12227</a> | Y | Y | Y | Y | N | Y | N | High   |
| 83. | Mamoudou A., Salhine R., Sevidzem S. L., Achukwi M. D., & Garabed R. (2018). Efficacy of Albendazole on Gastro-Intestinal Strongyles of Catle in Ngaoundere (Adamawa-Cameroon). <i>Integrative Journal of Veterinary Biosciences</i> , 2(2), 1-6.                                                                                                                                                                                                     | Y | Y | U | U | Y | Y | I | High   |
| 84. | Mamoudou, A., Ebene N. J., Suh P. F., & Mfopit M. Y. (2015). Prevalence and impact of bovine trypanosomiasis in Mayo Rey division, a Soudano-Sahelian zone of Cameroon. <i>Journal of Parasitology and Vector Biology</i> 7(5), 80-88.                                                                                                                                                                                                                | Y | Y | U | Y | Y | Y | Y | High   |
| 85. | Mamoudou, A., Khan P. V., & Lendzele S. S. (2015). Current prevalence of cattle trypanosomiasis and of its vector in Alme, the infested zone of Adamawa plateau Cameroon, two decades after the tsetse eradication campaign. <i>International Journal of Biological and Chemical Sciences</i> , 9(3), 1588-1598.                                                                                                                                      | Y | Y | U | Y | Y | Y | Y | High   |
| 86. | Mamoudou, A., Mbakou L. M., Ngu Ngwa V., Sevidzem S. L., Zoli A. P., & D., A. M. (2016). Preliminary assesment of bovine trypanosomiasis and its vectors in Santa, Bali and Bafut Sub-divisions of the North West Region, Cameroon. <i>International Journal of Biological and Chemical Sciences</i> , 10(1), 1-12.                                                                                                                                   | Y | Y | Y | Y | Y | Y | Y | High   |

[illegible]

|      |                                                                                                                                                                                                                                                                                                                                                                                                                                                                                                                                                                                                       |   |   |   |   |   |   |   |   |      |
|------|-------------------------------------------------------------------------------------------------------------------------------------------------------------------------------------------------------------------------------------------------------------------------------------------------------------------------------------------------------------------------------------------------------------------------------------------------------------------------------------------------------------------------------------------------------------------------------------------------------|---|---|---|---|---|---|---|---|------|
| 99.  | Mbuh J. V., Ndamukong K. J. N., Ntonifor N., & Nforlem G. F. (2008). Parasites of sheep and goats and their prevalence in Bokova, a rural area of Buea Sub Division, Cameroon. <i>Veterinary Parasitology</i> 156, 350–352.                                                                                                                                                                                                                                                                                                                                                                           | N | Y | Y | Y | N | Y | I | Y | High |
| 100. | Metou, O. M. N. (2016). <i>Influence de certains paramètres sur les prévalences des parasitoses gastro-intestinales des porcs dans les élevages traditionnels de trois départements de la région de l'Extrême-Nord Cameroun [Unpublished doctoral dissertation]</i> . (Doctor of Veterinary Medicine), School of Veterinary Medicine and Sciences, University of Ngaoundere, Cameroon.                                                                                                                                                                                                                | Y | Y | Y | Y | Y | Y | Y | Y | High |
| 101. | MINEPIA, FAO, & OMC. (2016). <i>Plan stratégique de prévention et de lutte contre la peste des Petits Ruminants (PPR) au Cameroun</i> . Retrieved from Cameroon:                                                                                                                                                                                                                                                                                                                                                                                                                                      | Y | Y | Y | Y | N | Y | N | Y | High |
| 102. | Modiyinji, A. F., Atsama M. A., Monamele G. C., Nola M., & Njouom R. (2018). High seroprevalence of hepatitis E among pigs suggests an animal reservoir in Cameroon. <i>The Journal of Infection in Developing Countries</i> , 12(8), 676-679.                                                                                                                                                                                                                                                                                                                                                        | Y | Y | U | Y | Y | Y | I | Y | High |
| 103. | Modjo, K. E. L. (2014). <i>Séroprévalence de la fièvre aphteuse chez les Bovins dans la région du Nord Cameroun [Unpublished doctoral dissertation]</i> . (Doctor of Veterinary Medicine), Institut Supérieur des Sciences de la Santé, Université des Montagnes, Bangangté, Cameroon.                                                                                                                                                                                                                                                                                                                | Y | Y | Y | Y | Y | Y | Y | Y | High |
| 104. | Mohamadou, B. (2017). <i>Etude de la prévalence de la trypanosomose chez les bovins abattus à l'abattoir municipal de Ngaoundéré (Cameroun) [Unpublished doctoral dissertation]</i> . (Doctor of Veterinary Medicine), School of Veterinary Medicine and Sciences, University of Ngaoundere, Cameroon.                                                                                                                                                                                                                                                                                                | Y | Y | Y | Y | Y | Y | Y | Y | High |
| 105. | Mohamadou, B. (2017). <i>Etude de la prévalence de la trypanosomose chez les bovins abattus à l'abattoir municipal de Ngaoundéré (Cameroun) [Unpublished doctoral dissertation]</i> . (Doctor of Veterinary Medicine), School of Veterinary Medicine and Sciences, University of Ngaoundere, Cameroon.                                                                                                                                                                                                                                                                                                | Y | Y | Y | Y | Y | Y | Y | Y | High |
| 106. | Moiffo, K. A. M. (2016). <i>Dépistage des anticorps anti-brucella chez les porcs dans certaines régions du Cameroun. [Unpublished doctoral dissertation]</i> . (Doctor of Veterinary Medicine), School of Veterinary Medicine and Sciences, University of Ngaoundere, Cameroon.                                                                                                                                                                                                                                                                                                                       | Y | N | Y | Y | Y | Y | N | Y | High |
| 107. | Mpouam, S. E., Achukwi M. D., Feussom K. J. M., Bengaly Z., & Ouedraogo G. A. (2011). Serological and parasitological prevalence of bovine trypanosomosis in small holder farms of the Vina division, Adamawa region of Cameroon. <i>Journal of Parasitology and Vector Biology</i> , 3(4), 44-51.                                                                                                                                                                                                                                                                                                    | Y | N | U | Y | Y | Y | Y | Y | High |
| 108. | Musallam, I., Ndour, A. P., Yempabou, D., Ngong, C. C., Dzousse, M. F., Mouiche-Mouliom, M. M., Feussom, J., Ntirandekura, J. B., Ntakirutimana, D., Fane, A., Dembele, E., Doumbia, A., Ayih-Akakpo, A., Pato, P., Pali, M., Tapsoba, A., Compaore, G. M., Gagara, H., Garba, A. I., Chengat Prakashbabu, B., ... Guitian, J. (2019). Brucellosis in dairy herds: A public health concern in the milk supply chains of West and Central Africa. <i>Acta tropica</i> , 197, 105042. <a href="https://doi.org/10.1016/j.actatropica.2019.105042">https://doi.org/10.1016/j.actatropica.2019.105042</a> | Y | Y | U | I | Y | Y | U | Y | High |
| 109. | Ndze, V. N., Cadar, D., Cságola, A., Kisfali, P., Kovács, E., Farkas, S., Ngu, A. F., Esona, M. D., Dán, Á., Tuboly, T., & Bányai, K. (2013). Detection of novel porcine bocaviruses in fecal samples of asymptomatic pigs in Cameroon. <i>Infection, genetics and evolution: journal of molecular epidemiology and evolutionary genetics in infectious diseases</i> , 17, 277–282. <a href="https://doi.org/10.1016/j.meegid.2013.03.006">https://doi.org/10.1016/j.meegid.2013.03.006</a>                                                                                                           | Y | I | I | I | N | Y | I | Y | High |

|      |                                                                                                                                                                                                                                                                                                                                                                                                                                  |   |   |   |   |   |   |   |   |      |
|------|----------------------------------------------------------------------------------------------------------------------------------------------------------------------------------------------------------------------------------------------------------------------------------------------------------------------------------------------------------------------------------------------------------------------------------|---|---|---|---|---|---|---|---|------|
| 110. | Ngadjie, T. M. (2019). <i>Prévalence et facteurs favorisants associés à la coccidiose dans les élevages de poulets de chair du Koung-khi [Unpublished doctoral dissertation]</i> . (Doctor of Veterinary Medicine), Institut Supérieur des Sciences de la Santé, Université des Montagnes, Bangangté, Cameroon.                                                                                                                  | Y | Y | U | U | Y | Y | Y | Y | High |
| 111. | Nghonjuyi, N. W., Kimbi H. K., & Tiambo C. K. (2014). Study of Gastro–Intestinal Parasites of Scavenging Chickens in Fako Division, Southwest Cameroon. <i>The Journal of Advances in Parasitology</i> 1(2), 30-34.                                                                                                                                                                                                              | Y | Y | Y | U | N | Y | Y | Y | High |
| 112. | Ngole, I. U., Ndamukong, K. J., & Mbuh, J. V. (2003). Internal parasites and haematological values in cattle slaughtered in Buea subdivision of Cameroon. <i>Tropical animal health and production</i> , 35(5), 409–413. <a href="https://doi.org/10.1023/a:1025811428008">https://doi.org/10.1023/a:1025811428008</a>                                                                                                           | Y | N | U | U | U | U | U | U | Low  |
| 113. | Ngomtcho, S., Weber, J. S., Ngo Bum, E., Gbem, T. T., Kelm, S., & Achukwi, M. D. (2017). Molecular screening of tsetse flies and cattle reveal different Trypanosoma species including T. grayi and T. theileri in northern Cameroon. <i>Parasites &amp; vectors</i> , 10(1), 631. <a href="https://doi.org/10.1186/s13071-017-2540-7">https://doi.org/10.1186/s13071-017-2540-7</a>                                             | Y | Y | Y | U | N | Y | N | Y | High |
| 114. | Ngoudjou, M. S. V. (2018). <i>Prévalence des lésions tuberculeuses viscérale à l'abattoir de Douala [Unpublished doctoral dissertation]</i> . (Doctor in Veterinary Medicine), Institut Supérieur des Sciences de la Santé, Université des Montagnes, Bangangté, Cameroon.                                                                                                                                                       | Y | Y | Y | Y | Y | Y | Y | Y | High |
| 115. | Ngounou, D. Y. D. (2015). <i>Séroprévalence et facteurs de risque de la toxoplasmose chez les ovins dans la localité de Ndawara (Nord-Ouest, Cameroun) [Unpublished doctoral dissertation]</i> . (Doctor of Veterinary Medicine), Institut Supérieur des Sciences de la Santé, Université des Montagnes, Bangangté, Cameroon.                                                                                                    | Y | Y | Y | Y | Y | Y | Y | Y | High |
| 116. | Nguena, G. N. R. (2017). <i>Epidémiologie de la peste porcine africaine dans les régions septentrionales du Cameroun [Unpublished doctoral dissertation]</i> . (Doctor of veterinary Medicine), School of Veterinary Medicine and Sciences, University of Ngaoundere, Cameroon.                                                                                                                                                  | Y | Y | Y | Y | Y | Y | Y | Y | High |
| 117. | Nguetoum, N. C. (2016). <i>Inventaire des espèces de tiques et Prévalence des Hémoparasites transmis par ces dernières en zone périurbaine de Ngaoundéré [Unpublished doctoral dissertation]</i> . (Doctor in Veterinary Medicine), School of Veterinary Medicine and Sciences, University of Ngaoundere, Cameroon.                                                                                                              | Y | Y | Y | U | N | Y | Y | Y | High |
| 118. | Ngu-Ngwa, V., Bessong-Takang N. A., & Awah-Ndukum J. (2020). Seroprevalence and Risk Factors of Leptospirosis among Slaughtered Cattle and Abattoir Workers in Ngaoundéré, Cameroon. <i>Asian Journal of Research in Animal and Veterinary Sciences</i> , 5(1), 8-19.                                                                                                                                                            | Y | Y | Y | Y | Y | Y | Y | Y | High |
| 119. | Ngwing, N. A., Poné, J. W., Mbida, M., Pagnah, A. Z., Njakoi, H., & Bilong, C. F. (2012). A preliminary analysis of some epidemiological factors involved in porcine cysticercosis in Bafut and Santa subdivisions, North West Region of Cameroon. <i>Asian Pacific journal of tropical medicine</i> , 5(10), 814–817. <a href="https://doi.org/10.1016/S1995-7645(12)60149-7">https://doi.org/10.1016/S1995-7645(12)60149-7</a> | Y | Y | Y | U | N | Y | Y | Y | High |
| 120. | Nimpaye, H., Njiokou F., Njine T., Njitchouang G. R., Cuny G., Herder S., Simo G. (2011). Trypanosoma Vivax, T. Congolense “Forest type” and T. Simaie : Prevalence in domestic animals of sleeping sickness in Cameroon. <i>Parasite: Journal de la Société Française de Parasitologie</i> , 18, 171-179.                                                                                                                       | Y | Y | U | Y | Y | Y | N | Y | High |
| 121. | Njabo, K. Y., Fuller, T. L., Chasar, A., Pollinger, J. P., Cattoli, G., Terregino, C., Monne, I., Reynes, J. M., Njouom, R., & Smith, T. B. (2012). Pandemic A/H1N1/2009 influenza virus in swine, Cameroon, 2010. <i>Veterinary microbiology</i> , 156(1-2), 189–192. <a href="https://doi.org/10.1016/j.vetmic.2011.09.003">https://doi.org/10.1016/j.vetmic.2011.09.003</a>                                                   | Y | Y | U | Y | Y | Y | N | Y | High |



[illegible]

[illegible]

|      |                                                                                                                                                                                                                                                                                                                                                                                                                                                                   |   |   |   |   |   |   |   |   |        |
|------|-------------------------------------------------------------------------------------------------------------------------------------------------------------------------------------------------------------------------------------------------------------------------------------------------------------------------------------------------------------------------------------------------------------------------------------------------------------------|---|---|---|---|---|---|---|---|--------|
| 145. | Sehgal, R. N. M., Valkiūnas G., Lezhova T. A., & Smith T. B. (2006). Blood parasites of chickens in Uganda and Cameroon with molecular descriptions of <i>Leucocytozoon schoutedeni</i> and <i>Trypanosoma gallinarum</i> . <i>Journal of Parasitology</i> , 92(6), 1336-1343.                                                                                                                                                                                    | Y | Y | U | U | Y | Y | N | Y | High   |
| 146. | Sevidzem, S. L., Mamoudou A., Mavougou J. F., Ikoum D., Lebele M. B. O., Hiol V. D., . . . R., G. (2019). Serological Epidemiology of Foot-and-mouth Disease among Sedentary Mixed-species Herds in Adamawa Region, Cameroon. <i>Journal of Advances in Microbiology</i> , 17(2), 1-14                                                                                                                                                                            | Y | Y | U | N | Y | Y | Y | Y | High   |
| 147. | Shey-Njila, O., Daouda, Nya E., Zoli P. A., Walravens K., Godfroid J., & Geerts S. (2005). Serological Survey of Bovine Brucellosis in Cameroon. <i>Revue d'élevage et de médecine vétérinaire des pays tropicaux</i> , 58(3), 139-143.                                                                                                                                                                                                                           | Y | Y | Y | Y | Y | Y | N | Y | High   |
| 148. | Signie, N. C. (2019). <i>Prévalence et facteurs de risque des mammites subcliniques dans les élevages de vaches laitières du département du Noun [Unpublished doctoral dissertation]</i> . (Doctor of Veterinary Medicine), Institut Supérieur des Sciences de la Santé, Université des Montagnes, Bangangté, Cameroon.                                                                                                                                           | Y | N | U | Y | Y | Y | N | Y | Medium |
| 149. | Silatsa, B. A., Simo G., Githaka N., Mwaura S., Kamga R. M., Oumarou F., Keambou C., R. P., Djikeng A., Kuiate J-R., Njiokou F., & Pelle R. (2019). A comprehensive survey of the prevalence and spatial distribution of ticks infesting cattle in different agro-ecological zones of Cameroon. <i>Parasites &amp; Vectors</i> , 12, 489 . <a href="https://doi.org/10.1186/s13071-019-3738-7">https://doi.org/10.1186/s13071-019-3738-7</a>                      | Y | I | I | Y | Y | Y | I | Y | High   |
| 150. | Silatsa, B. A., Simo, G., Githaka, N., Mwaura, S., Kamga, R. M., Oumarou, F., Keambou, C., Bishop, R. P., Djikeng, A., Kuiate, J. R., Njiokou, F., & Pelle, R. (2019). A comprehensive survey of the prevalence and spatial distribution of ticks infesting cattle in different agro-ecological zones of Cameroon. <i>Parasites &amp; vectors</i> , 12(1), 489. <a href="https://doi.org/10.1186/s13071-019-3738-7">https://doi.org/10.1186/s13071-019-3738-7</a> | Y | Y | Y | Y | Y | Y | Y | Y | High   |
| 151. | Simeni, K. F. (2014). <i>Epidémiologie des parasites gastro-intestinaux des caprins dans le département du Moungo (Littoral Cameroun) [Unpublished doctoral dissertation]</i> . (Doctor in Veterinary Medicine), Institut Supérieur des Sciences de la Santé, Université des Montagnes, Bangangté, Cameroon.                                                                                                                                                      | Y | Y | Y | Y | Y | Y | Y | Y | High   |
| 152. | Simo, G., Asonganyi T., Nkinin S. W., Njiokou F., & Herder S. (2006). High prevalence of <i>Trypanosoma brucei</i> gambiense group 1 in pigs from the Fontem sleeping sickness focus in Cameroon. <i>Veterinary parasitology</i> , 139, 57-66.                                                                                                                                                                                                                    | Y | Y | Y | Y | Y | Y | N | Y | High   |
| 153. | Simo, G., Fongho P., Farikou O., Ndjeuto-Tchouli N. P. I., Tchouomene-Labou J., Njiokou F., & Asonganyi T. (2015). Trypanosome infection rates in tsetse flies in the “silent” sleeping sickness focus of Bafia in the Centre Region in Cameroon. <i>Parasites &amp; Vectors</i> , 8, 528. <a href="https://doi.org/10.1186/s13071-015-1156-z">https://doi.org/10.1186/s13071-015-1156-z</a>                                                                      | Y | I | I | Y | Y | Y | I | Y | High   |
| 154. | Simo, G., Njitchouang G. R., Njiokou F., Cuny G., & Tazoacha A. (2012). Genetic characterization of <i>Trypanosoma brucei</i> circulating in domestic animals of the Fontem sleeping sickness of Cameroon. <i>Microbes and infection</i> , 14, 651-658.                                                                                                                                                                                                           | Y | Y | Y | Y | Y | Y | N | Y | High   |
| 155. | Simo, G., Sobgwi P. F., Njitchouang G. R., Njiokou F., Kuiate J. R., Cuny G., & Asonganyi T. (2013). Identification and genetic characterization of <i>Trypanosoma congolense</i> in domestic animals in Fontem in the South-West region of Cameroon. <i>Infection, Genetics and Evolution</i> , 18, 66-73.                                                                                                                                                       | Y | Y | Y | Y | Y | Y | N | Y | High   |
| 156. | Snoeck, C. J., Komoyo, G. F., Mbee, B. P., Nakouné, E., Le Faou, A., Okwen, M. P., & Muller, C. P. (2012). Epidemiology of chicken anemia virus in Central African Republic and Cameroon. <i>Virology journal</i> , 9, 189. <a href="https://doi.org/10.1186/1743-422X-9-189">https://doi.org/10.1186/1743-422X-9-189</a>                                                                                                                                         | N | Y | I | I | N | Y | Y | Y | High   |

|      |                                                                                                                                                                                                                                                                                                                                                                                                                                                                                            |   |   |   |   |   |   |   |   |        |
|------|--------------------------------------------------------------------------------------------------------------------------------------------------------------------------------------------------------------------------------------------------------------------------------------------------------------------------------------------------------------------------------------------------------------------------------------------------------------------------------------------|---|---|---|---|---|---|---|---|--------|
| 157. | Snoeck, C. J., Owoade, A. A., Couacy-Hymann, E., Alkali, B. R., Okwen, M. P., Adeyanju, A. T., Komoyo, G. F., Nakouné, E., Le Faou, A., & Muller, C. P. (2013). High genetic diversity of Newcastle disease virus in poultry in West and Central Africa: cocirculation of genotype XIV and newly defined genotypes XVII and XVIII. <i>Journal of clinical microbiology</i> , 51(7), 2250–2260. <a href="https://doi.org/10.1128/JCM.00684-13">https://doi.org/10.1128/JCM.00684-13</a>     | Y | Y | Y | Y | Y | Y | N | Y | High   |
| 158. | Soussai, F. O. (2017). <i>Prévalences et facteurs de risques des hémoparasites des bovins abattus à l'abattoir municipal de Ngaoundéré [Unpublished doctoral dissertation]</i> . (Doctor of Veterinary Medicine), School of Veterinary Medicine and Sciences, University of Ngaoundere, Cameroon.                                                                                                                                                                                          | Y | Y | Y | Y | Y | Y | Y | Y | High   |
| 159. | Suh, P. F., Njiokou F., Mamoudou A., Ahmadou T. M., Mouhaman A., & Garabed R. (2017). Bovine trypanosomiasis in tsetse-free pastoral zone of the Far-North region, Cameroon. <i>Journal of Vector Borne Diseases</i> , (54), 263–269.                                                                                                                                                                                                                                                      | Y | N | Y | N | Y | Y | N | Y | Medium |
| 160. | Takang, E. E., LeBreton, M., Ayuk, C. E., & MacLeod, E. T. (2019). A socio-economic study of <i>Fasciola</i> infections in cattle and sheep at the Etoudi slaughterhouse, Yaoundé, Cameroon. <i>Journal of helminthology</i> , 94, e92. <a href="https://doi.org/10.1017/S0022149X19000890">https://doi.org/10.1017/S0022149X19000890</a>                                                                                                                                                  | Y | Y | Y | Y | Y | Y | Y | Y | High   |
| 161. | Talba, Y. D. (2014). <i>Etude Epidémiologique de la PPCB dans le Nord Cameroun : Département de la Benoué [Unpublished doctoral dissertation]</i> . (Doctor in Veterinary Medicine), Institut Supérieur des Sciences de la Santé, Université des Montagnes, Bangangté, Cameroon.                                                                                                                                                                                                           | Y | Y | Y | Y | Y | Y | Y | Y | High   |
| 162. | Tanenbe, C., Gambo H., Musongong A. G., Boris O., & Achukwi M. D. (2010). Prévalence de la trypanosomose bovine dans les départements du Faro et Déo, et de la Vina au Cameroun : bilan de vingt années de lutte contre les glossines. <i>Revue d'élevage et de médecine vétérinaire des pays tropicaux.</i> , 63(3-4), 63-69.                                                                                                                                                             | Y | Y | Y | Y | Y | Y | Y | Y | High   |
| 163. | Tchedele, A. O. (2017). <i>Tuberculose bovine chez la chèvre dans la ville de Garoua: performances diagnostiques de l'intradermo-tuberculation, prévalence et facteurs de risque zoonotique [Unpublished doctoral dissertation]</i> . (Doctor of Veterinary Medicine), School of Veterinary Medicine and sciences, University of Ngaoundere, Cameroon.                                                                                                                                     | Y | Y | Y | Y | Y | Y | Y | Y | High   |
| 164. | Tchouagoue, E. R. (2014). <i>Epidémiologie et moyen de lutte contre les parasites gastro- intestinaux chez les caprins dans le Département du Ndé [Unpublished doctoral dissertation]</i> . (Doctor of Veterinary Medicine), Institut Supérieur des Sciences de la Santé, Université des Montagnes, Bangangté, Cameroon.                                                                                                                                                                   | Y | Y | Y | Y | Y | Y | Y | Y | High   |
| 165. | Tchouankui, N. H. (2014). <i>Epidémiologie des Parasites gastro-intestinaux chez les caprins dans le Département de la Mefou-et-Akono</i> . (Doctor of Veterinary Medicine), Institut Supérieur des Sciences de la Santé, Université des Montagnes, Bangangté, Cameroon.                                                                                                                                                                                                                   | Y | Y | Y | Y | Y | Y | Y | Y | High   |
| 166. | Tchouankui, N. H. (2014). <i>Epidémiologie des Parasites gastro-intestinaux chez les caprins dans le Département de la Mefou-et-Akono [Unpublished doctoral dissertation]</i> . (Doctor of Veterinary Medicine), Institut Supérieur des Sciences de la Santé, Université des Montagnes, Bangangté, Cameroon.                                                                                                                                                                               | Y | Y | Y | Y | Y | Y | Y | Y | High   |
| 167. | Tchoumbou, M. A., Mayi, M., Malange, E., Foncha, F. D., Kowo, C., Fru-Cho, J., Tchuinkam, T., Awah-Ndukum, J., Dorazio, R., Nota Anong, D., Cornel, A. J., & Sehgal, R. (2020). Effect of deforestation on prevalence of avian haemosporidian parasites and mosquito abundance in a tropical rainforest of Cameroon. <i>International journal for parasitology</i> , 50(1), 63–73. <a href="https://doi.org/10.1016/j.ijpara.2019.10.006">https://doi.org/10.1016/j.ijpara.2019.10.006</a> | N | Y | U | U | N | Y | U | Y | Low    |

[illegible]
